# Supplementary material for: Platelet-derived miR-223 promotes a phenotypic switch in arterial injury repair
Source: JCI journal article supplement (doi:10.1172/jci124508), 2019-01-15
Supplement: sd1 [file 1]

## Supplementary Figures

FIGURE S1

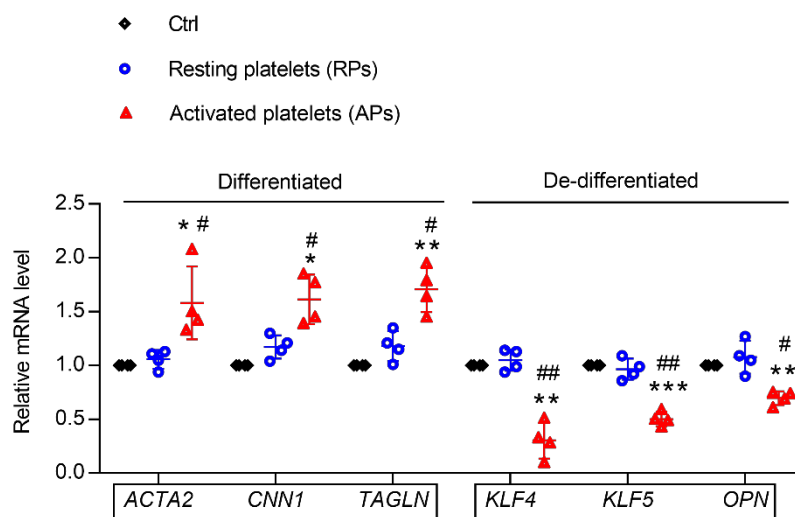

**Figure S1. The effects of resting platelets or activated platelets on regulation of VSMCs phenotype.** The expressions of markers for differentiation (*ACTA2*, *CNN1*, *TAGLN*) and dedifferentiation (*KLF4*, *KLF5*, *OPN*) in VSMCs (Ctrl) and in VSMCs after co-cultured with resting platelets (RPs) or activated platelets (APs) were determined by qRT-PCR. Data were presented as mean  $\pm$  SD (n = 4). \*P<0.05, \*\*P<0.01, \*\*\*P<0.001, vs Ctrl. #P<0.05, ##P<0.01, vs RPs. Statistical significance was determined using 1-way ANOVA followed by Tukey-Kramer multiple comparisons test.

**FIGURE S2**

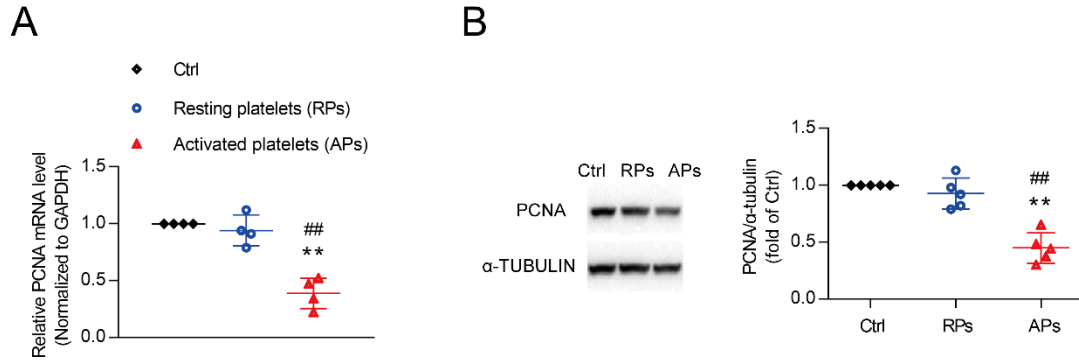

**Figure S2. The effect of RPs and APs on PCNA expression in VSMCs.** The expression of marker for proliferation (PCNA) in VSMCs (Ctrl) and in VSMCs after co-cultured with resting platelets (RPs) or activated platelets (APs) were determined by **(A)** qRT-PCR (n = 4) or **(B)** Western blot (n = 5), respectively. Data were presented as mean  $\pm$  SD. \*\*P<0.01, vs Ctrl. ##P<0.01, vs RPs. Statistical significance was determined using 1-way ANOVA followed by Tukey-Kramer multiple comparisons test.

**FIGURE S3**

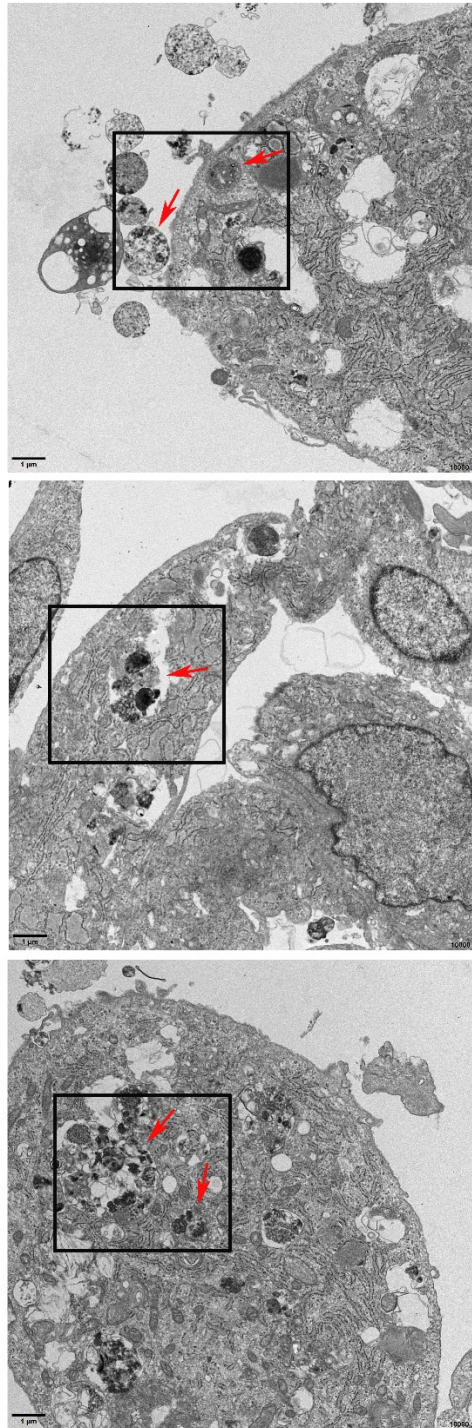

**Figure S3. Transmission electron microscopy imaging of the process that platelets were internalized into the VSMCs.** Platelets attached to the membrane of VSMCs, and then platelets are internalized into VSMCs. Finally, platelets are fused with lysosomes and lysed in VSMCs. The arrow indicates the entering and internalized platelets. Scale bar: 1  $\mu\text{m}$ .

**FIGURE S4**

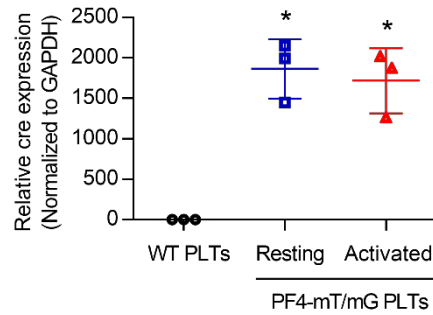

**Figure S4. The expression of cre recombinase in platelets isolated from wildtype and PF4-mTmG mouse.** The mRNA level of cre was detect by qRT-PCR in wildtype (WT) mice platelets (PLTs), resting PF4-mTmG mouse PLTs, and thrombin-activated PF4-mTmG mouse PLTs. Data were presented as mean  $\pm$  SD (n = 3). \*P<0.05 vs WT PLTs. Statistical significance was determined using 1-way ANOVA followed by Tukey-Kramer multiple comparisons test.

**FIGURE S5**

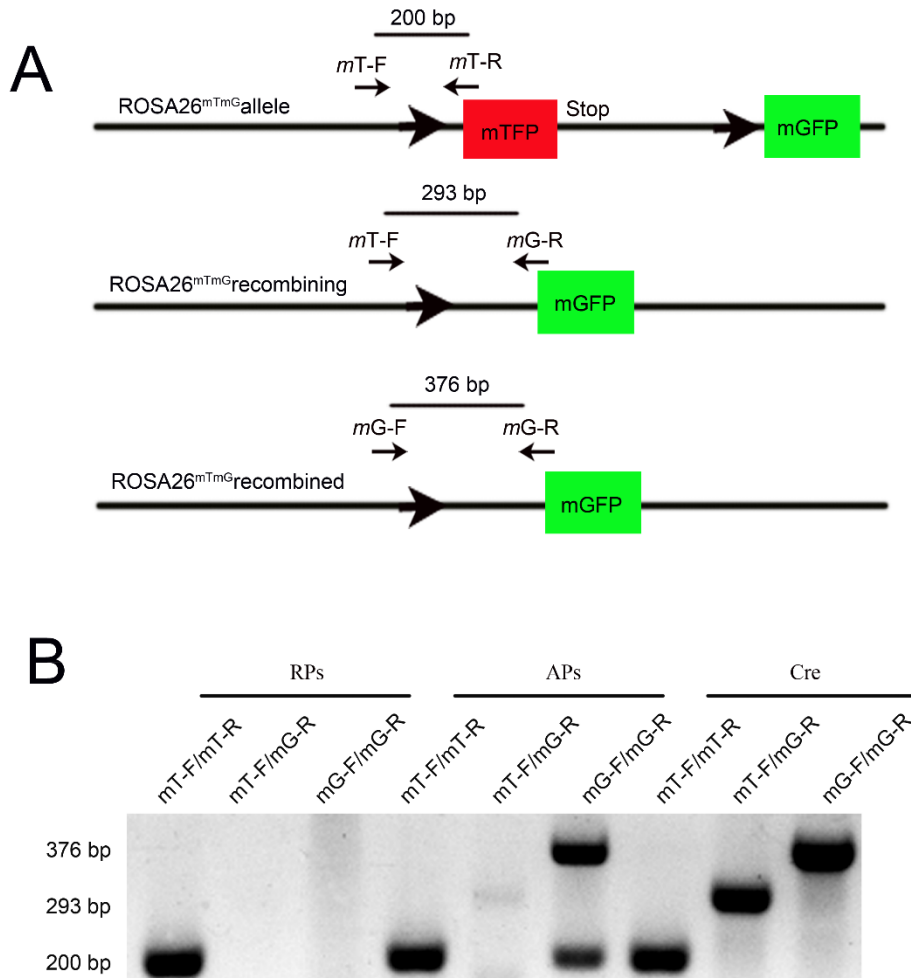

**Figure S5. PF4-icre murine platelets mediated mTmG mouse VSMCs recombined after 48 hours co-culture. (A)** A schematic diagram of the ROSA26mTmG allele before and after cre-recombination along with the locations of the PCR primers and the expected sizes of amplicons for non-recombined (200 bp), recombining (293 bp) and recombined (376 bp) alleles. **(B)** The representative blot showing PCR amplicons in VSMCs after co-cultured with RPs, APs and cre. RPs: resting platelets; APs: thrombin-activated platelets.

**FIGURE S6**

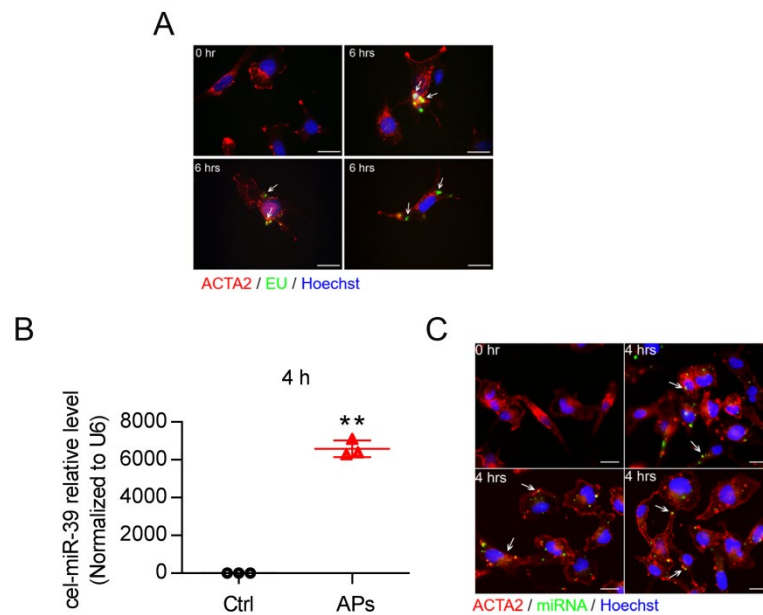

**Figure S6. The platelet RNAs were incorporated and utilised in VSMCs after the horizontal transfer. (A)** EU-labeled PLPs were incubated under serum-free conditions for 4 h with VSMCs (red, ACTA2). PLPs were generated from MEG-01 cells that had been exposed to EU. EU in PLPs was visualized using Click-iT RNA Alexa Fluor 488 (green). Scale bar: 20  $\mu$ m. **(B)** Relative quantity of cel-miR-39 in VSMCs co-cultured with activated platelets after transfection with cel-miR-39. Data were presented as mean  $\pm$  SD (n = 3). \*\*\*P<0.001 vs Ctrl. Statistical significance was determined using Parametric t-test. **(C)** Representative confocal image of VSMCs co-cultured with or without activated platelets after transfection with miR-Scr-FITC (green). Ctrl: control; APs: thrombin-activated platelets. Scale bar: 20  $\mu$ m.

**FIGURE S7**

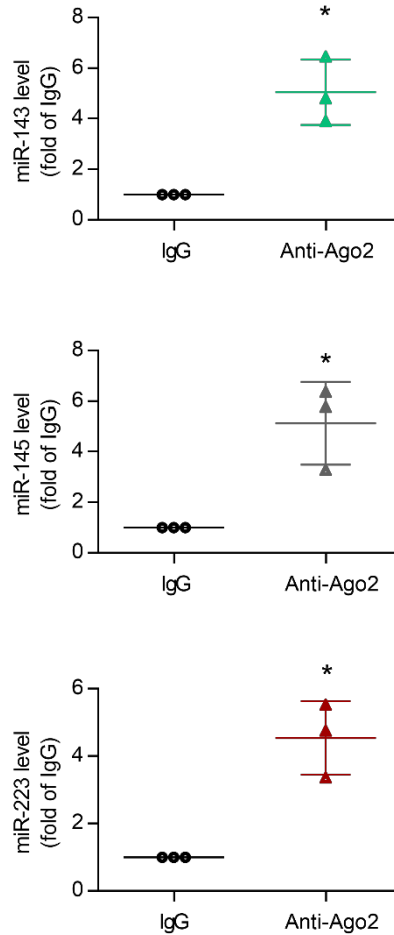

**Figure S7. Platelets contained functional Ago2•miR-143/145/223 effector complexes.** Protein extracts derived from the platelets were subjected to immunoprecipitation using anti-Ago2 antibody, followed by quantitative miR-143, miR-145 and miR-223 detection by qPCR. Data were presented as mean  $\pm$  SD (n = 3). \*P<0.05 vs IgG. Statistical significance was determined using Parametric t-test.

**FIGURE S8**

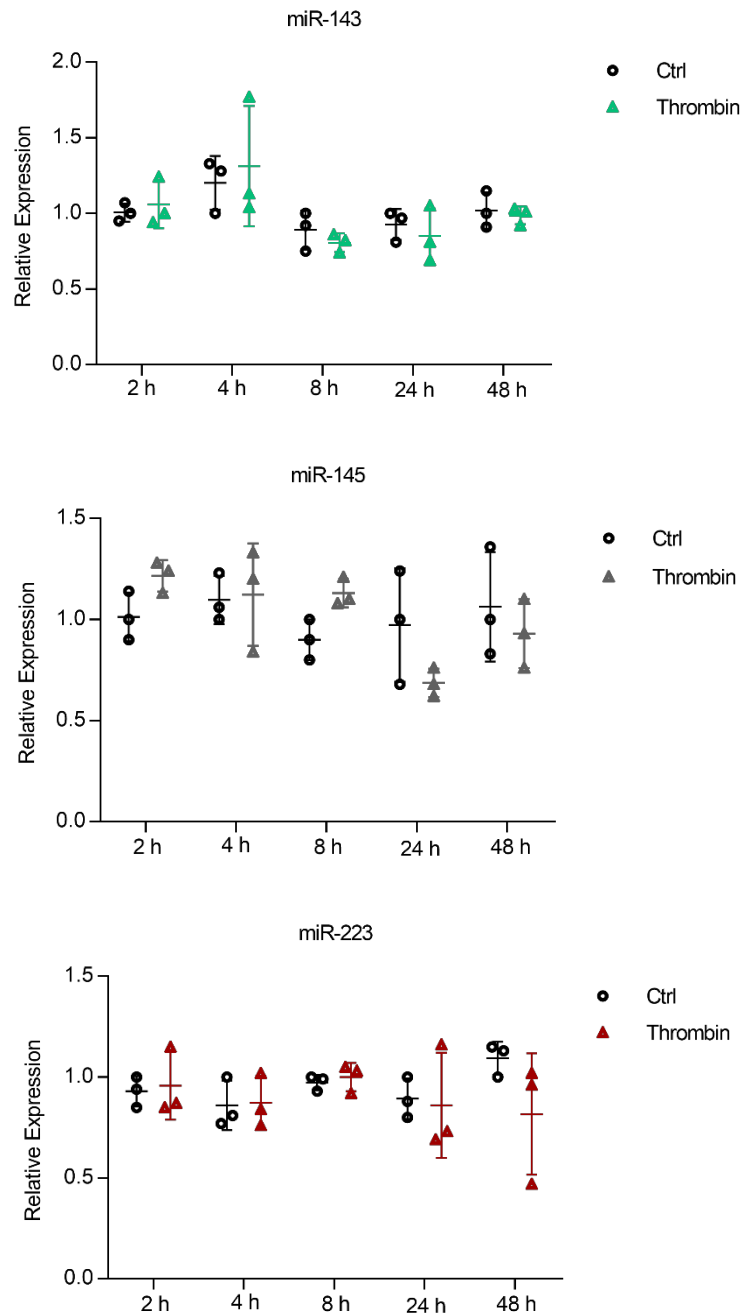

**Figure S8. Thrombin did not change the levels of miRNAs in VSMCs.** VSMCs were treated with or without 0.1 U/ml thrombin for 2, 4, 8, 24 or 48 hours. The levels of miR-143, miR-145 and miR-223 in VSMCs were detected by qRT-PCR. Data were presented as mean  $\pm$  SD (n = 3). Statistical significance was determined using Parametric t-test.



## FIGURE S9

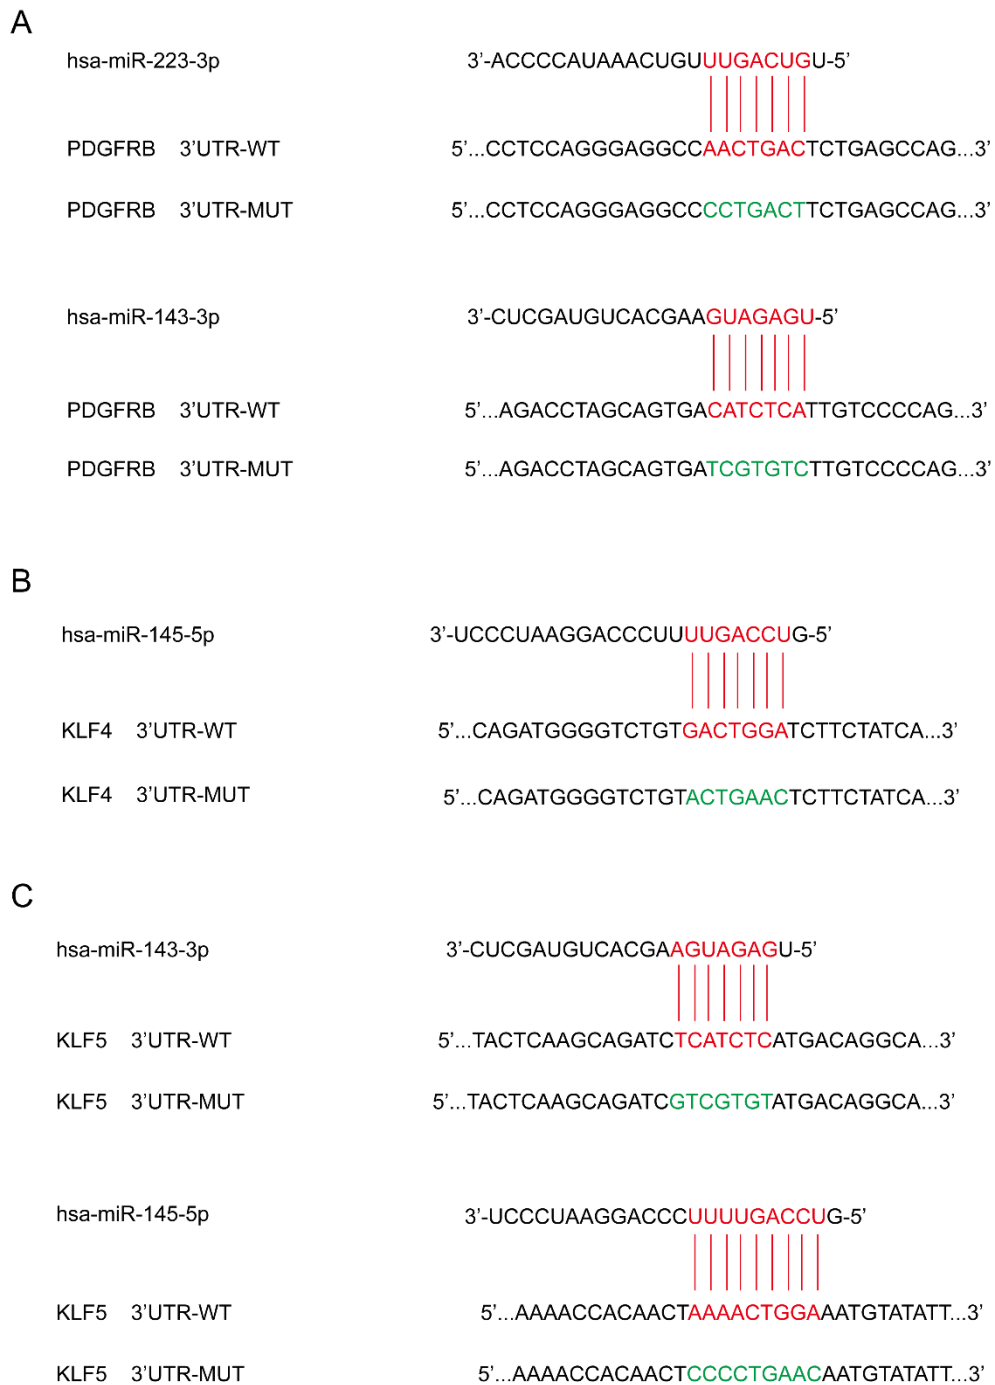

**Figure S9. Schematic representation of PDGFR $\beta$ , KLF4, KLF5 3'UTRs showing putative miRNA target site.**

**FIGURE S10**

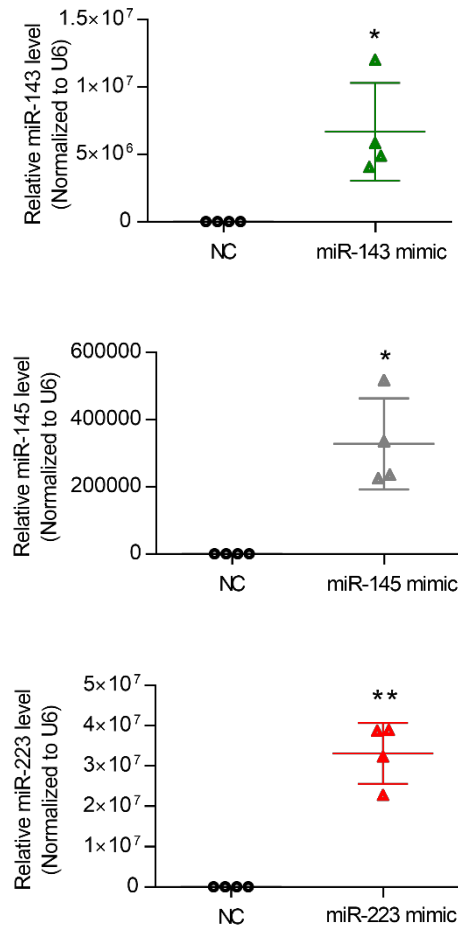

**Figure S10. The levels of miR-143, miR-145 and miR-223 in VSMCs after transfection.** VSMCs were transfected with miR-143, miR-145 and miR-223 mimic for 48 hours. The levels of miR-143, miR-145 and miR-223 were detected by qRT-PCR, respectively. Data were presented as mean  $\pm$  SD (n = 4). \*P<0.05, \*\*P<0.01 vs NC. Statistical significance was determined using Parametric t-test.

**FIGURE S11**

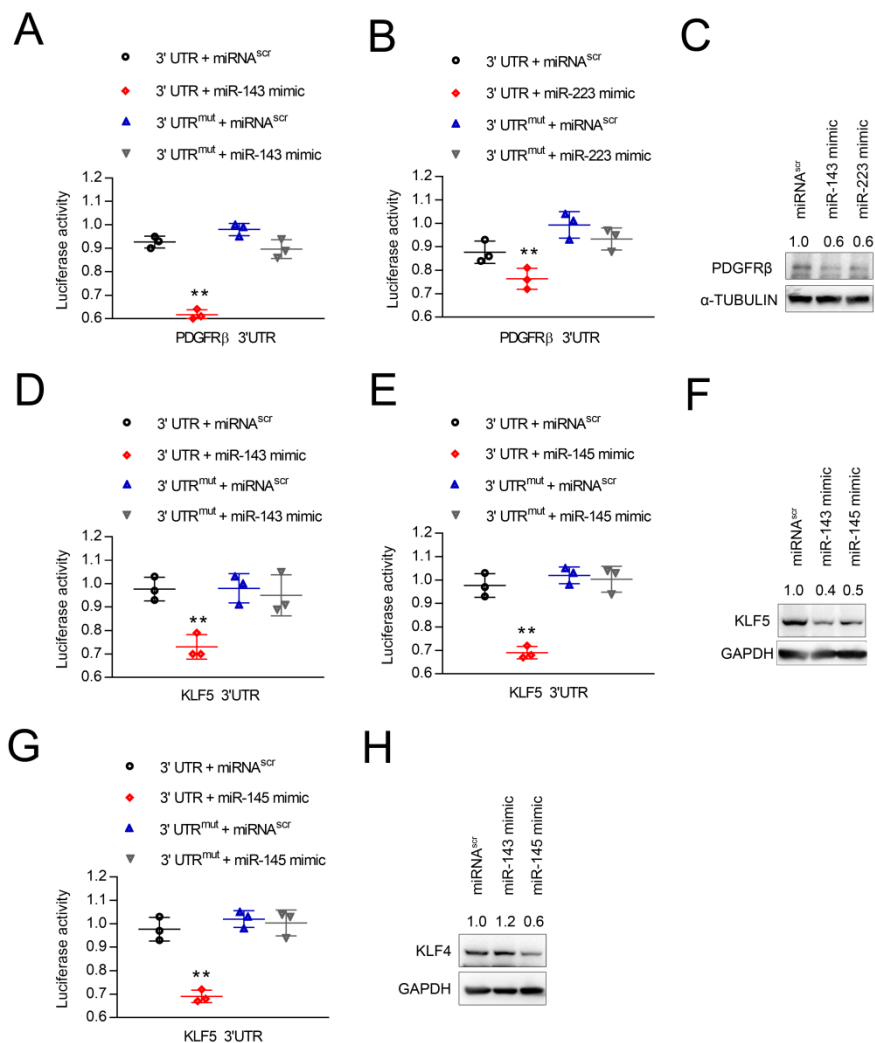

**Figure S11. KLF4, KLF5 and PDGFR $\beta$  were direct targets of miR-143, miR-145, and miR-223.** (A-B) Luciferase activity assay in VSMCs following introduction of PDGFR $\beta$  3' UTR or mutant 3' UTR (mut) with or without miR-143 or miR-223 mimic (n = 3). (C) The expression of PDGFR $\beta$  in VSMCs transfected with a scrambled (scr) miRNA, miR-143 mimic and miR-223 mimic (n = 6). (D-E) Luciferase activity assay in VSMCs following introduction of KLF5 3' UTR or mutant 3' UTR (mut) with or without miR-143 or miR-145 mimic (n = 3). (F) The expression of KLF5 in VSMCs transfected with a scrambled (scr) miRNA, miR-143 mimic and miR-145 mimic (n = 6). (G) Luciferase activity assay in VSMCs following introduction of KLF4 3' UTR or mutant 3' UTR (mut) with or without miR-145 mimic (n = 3). (H) The expression of KLF4 in VSMCs transfected with a scrambled (scr) miRNA, miR-143 mimic and miR-145 mimic (n = 6). Data were presented as mean  $\pm$  SD. \*\*P<0.01, vs miRNA<sup>scr</sup>. Statistical significance was determined using 1-way ANOVA followed by Tukey-Kramer multiple comparisons test.

**FIGURE S12**

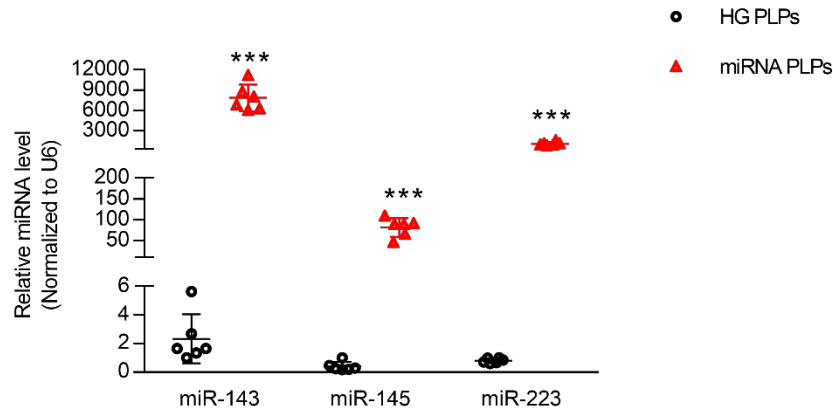

**Figure S12. miR-143, miR-145, and miR-223 were overexpressed in high glucose treated MEG-01 cells-derived platelet-like particles (HG PLPs).** High glucose (HG) treated MEG-01 cells were simultaneously transfected with miR-143, miR-145, and miR-223 at 100 nM by using lipofectamine RNAiMAX reagent (miRNA PLPs). After transfection, PLPs were collected from Thrombopoietin (TPO)-stimulated MEG-01 cells. The levels of miR-143, miR-145, and miR-223 in PLPs were detected by qRT-PCR, respectively. Data were presented as mean  $\pm$  SD (n = 6). \*\*\*P<0.001 vs HG PLPs. Statistical significance was determined using Parametric t-test.

**Figure S13**

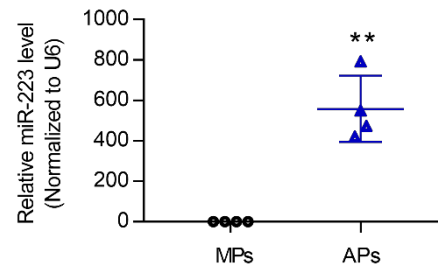

**Figure S13. The level of miR-223 in VSMCs co-cultured with platelets-derived microparticles and activated platelets.** VSMCs were co-cultured with platelets-derived microparticles (MPs) and activated platelets (APs) for 4 hours. The level of miR-223 in VSMCs was detected by qRT-PCR. MPs were in supernatant after removing thrombin-stimulated platelets. Data are presented as mean  $\pm$  SD (n = 4). \*\* $P < 0.01$  vs MPs. Statistical significance was determined using Parametric t-test.

## Supplemental Tables

**Table S1. Clinical characteristics of healthy subjects (HS) and patients with diabetes mellitus (DM)**

|                                          | HS              | DM                | <i>P</i> value |
|------------------------------------------|-----------------|-------------------|----------------|
|                                          | N=10            | N=11              |                |
| Age (years $\pm$ SD)                     | 33.1 $\pm$ 9.4  | 46.1 $\pm$ 12.6   | /              |
| Gender (Males/Females)                   | 6/4             | 8/3               | /              |
| BMI (kg/m <sup>2</sup> $\pm$ SD)         | 20.6 $\pm$ 2.8  | 30.8 $\pm$ 6.4*   | < 0.05         |
| Blood glucose (mg/dL $\pm$ SD)           | 108.8 $\pm$ 7.7 | 197.1 $\pm$ 92.3* | < 0.05         |
| HbA1c (% $\pm$ SD)                       | 5.1 $\pm$ 0.7   | 7.8 $\pm$ 1.1*    | < 0.05         |
| Systolic blood pressure (mmHg $\pm$ SD)  | 116.1 $\pm$ 8.5 | 129.9 $\pm$ 14.5* | < 0.05         |
| Diastolic blood pressure (mmHg $\pm$ SD) | 78.4 $\pm$ 4.6  | 79.3 $\pm$ 10.2   | /              |
| Hypertension (%)                         | 0/10 (0%)       | 4/11 (36.4%)      | /              |
| CAD (%)                                  | 0/10 (0%)       | 2/11 (18.2%)      | /              |

This Table represents typical differences observed between a diabetes mellitus group and our normal control. All data were expressed as mean  $\pm$  SD. The parametric t-test or Fisher's exact test was performed for comparisons of two groups. Analysis was performed with Prism software (GraphPad Software, Inc, La Jolla, CA). \*A difference of  $P < 0.05$  was considered significant.

**Table S2: The sequences for miRNA mimic or inhibitor**

| <b>Gene</b>          | <b>sense ( 5'-3' )</b>     | <b>antisense ( 5'-3' )</b>  |
|----------------------|----------------------------|-----------------------------|
| Negative control     | UUCUCCGAACGUGUCA<br>CGUTT  | ACGUGACACGUUCG<br>GAGAATT   |
| hsa-miR-143 mimics   | UGAGAUGAAGCACUGU<br>AGCUC  | GCUACAGUGCUUCA<br>UCUCAUU   |
| hsa-miR-145 mimics   | GUCCAGUUUCCCAGG<br>AAUCCCU | GGAUUCCUGGGAAA<br>ACUGGACUU |
| hsa-miR-223 mimics   | UGUCAGUUUGUCAAU<br>ACCCCA  | GGGUAUUUGACAAA<br>CUGACAUU  |
| cel-miR-39-3p mimics | UCACCGGGUGUAAAUC<br>AGCUUG | AGCUGAUUUACACC<br>CGGUGAUU  |

**Table S3: Primers for miRNA PCR**

| <b>Primer</b> | <b>Forward Sequence</b>     | <b>Reverse Sequence</b>      |
|---------------|-----------------------------|------------------------------|
| hsa-miR-143   | CTGGCGTTGAGATGAAGC<br>AC    | CAGAGCAGGGTCCGAG<br>GTA      |
| hsa-miR-145   | TGCCGAGTCCAGTTTTCC<br>C     | TATGGTTGTTACGAGT<br>CCTTCAC  |
| hsa-miR-223   | GTTGCTCCTGTCAGTTTG<br>TCAA  | TATGGTTGTTACGACT<br>CCTTCAC  |
| mmu-miR-143   | CTGGCGTTGAGATGAAGC<br>AC    | CAGAGCAGGGTCCGAG<br>GTA      |
| mmu-miR-145   | TGCCGAGTCCAGTTTTCC<br>C     | TATGGTTGTTACGAGT<br>CCTTCAC  |
| mmu-mir-223   | GTTGCTCCTGTCAGTTTG<br>TCAA  | TATGGTTGTTACGACT<br>CCTTCAC  |
| U6            | ATTGGAACGATACAGAG<br>AAGATT | GGAACGCTTCACGAATT<br>TG      |
| cel-miR-39-3p | CGTCGATCACCGGGTGTA<br>AA    | TATGGTTGTTCTGCTCT<br>CTGTCTC |



**Table S4: Primers for mRNA PCR (Human)**

| <b>Primer</b> | <b>Forward Sequence</b>     | <b>Reverse Sequence</b>    |
|---------------|-----------------------------|----------------------------|
| ACTA2         | GTGTTGCCCTGAAGAGCAT         | GCTGGGACATTGAAAGT<br>CTCA  |
| CNN1          | CTGTCAGCCGAGGTTAAGAAC       | GAGGCCGTCCATGAAGT<br>TGTT  |
| TAGLN         | CCGTGGAGATCCCAACTGG         | CCATCTGAAGGCCAATG<br>ACAT  |
| KLF4          | CCCACATGAAGCGACTTCCC        | CAGGTCCAGGAGATCGT<br>TGAA  |
| KLF5          | TCAGTCGTAGACCAGTTCTTCA      | CTGGGATTTGTAGAGGC<br>CAGT  |
| OPN           | GAAGTTTCGCAGACCTGACAT       | GTATGCACCATTCAACT<br>CCTCG |
| PCNA          | CCTGCTGGGATATTAGCTCCA       | CAGCGGTAGGTGTCGA<br>AGC    |
| GAPDH         | CATGAGAAGTATGACAACAGC<br>CT | AGTCCTTCCACGATACC<br>AAAGT |

Full uncut gels

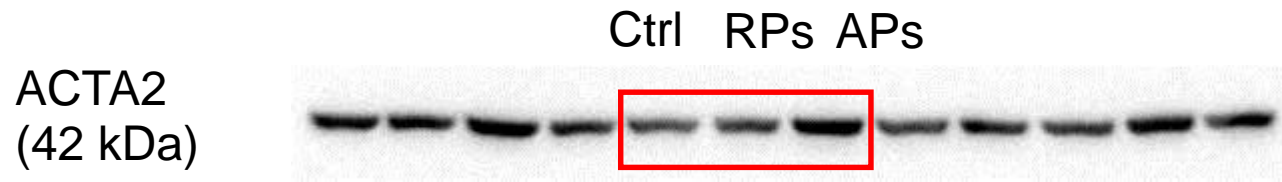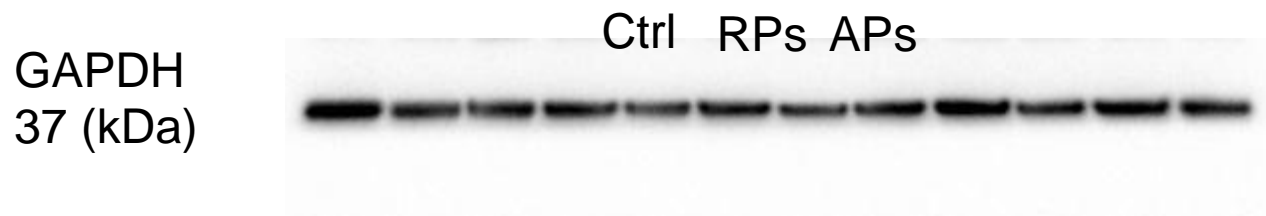

Full unedited gel for Figure1A  
Acquired with ChemiDoc (BioRad)

CNN1  
(34 kDa)

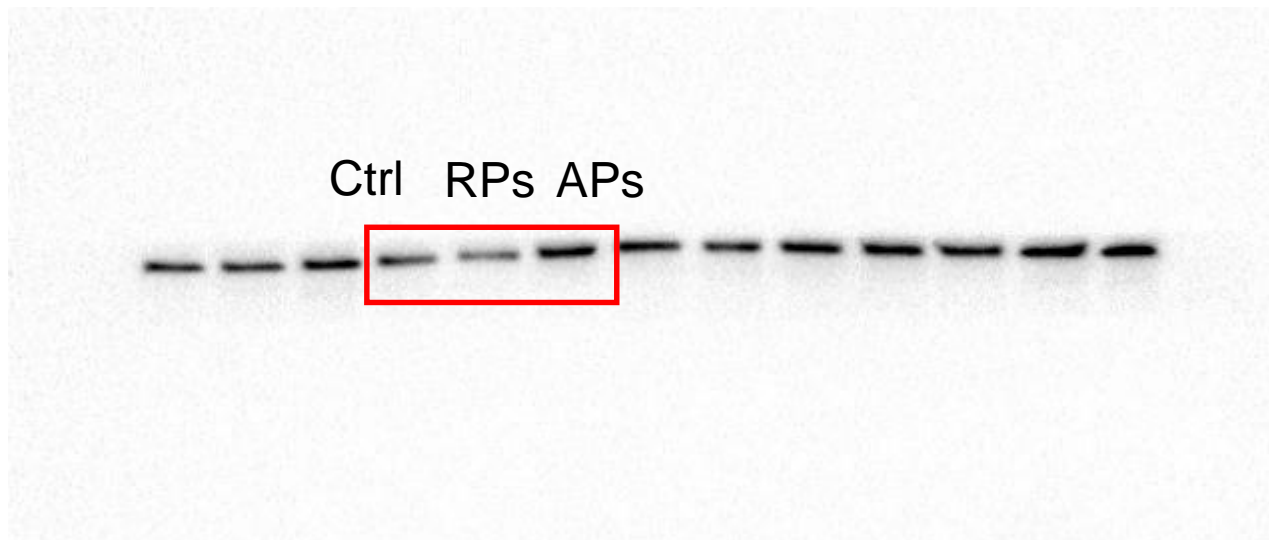

$\alpha$ -TUBULIN  
(50 kDa)

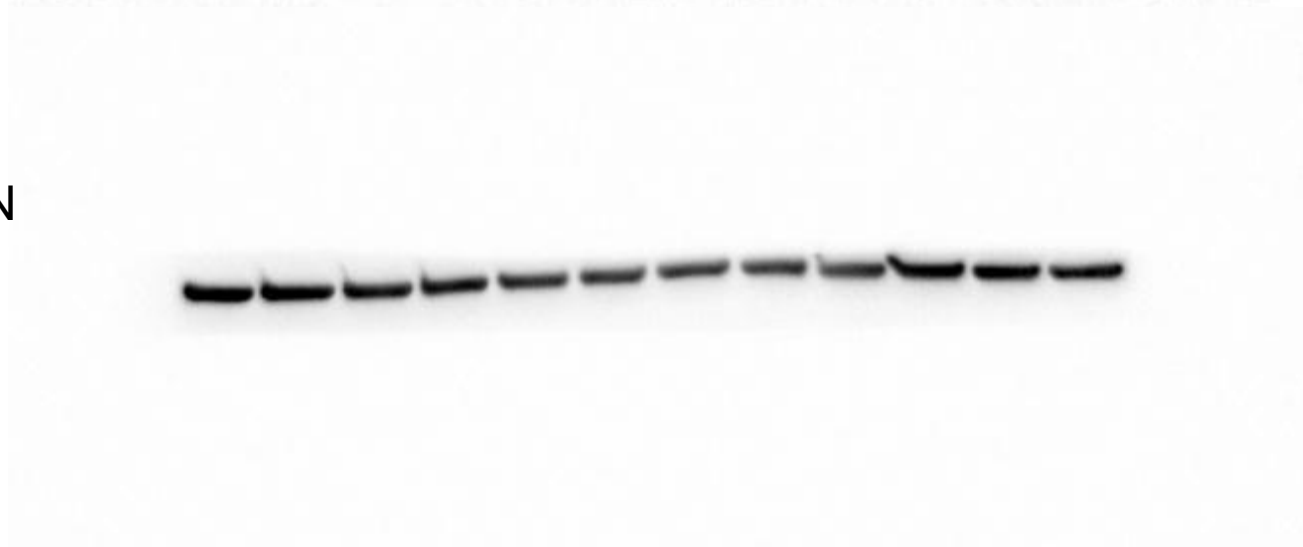

Full unedited gel for Figure1A  
Acquired with ChemiDoc (BioRad)

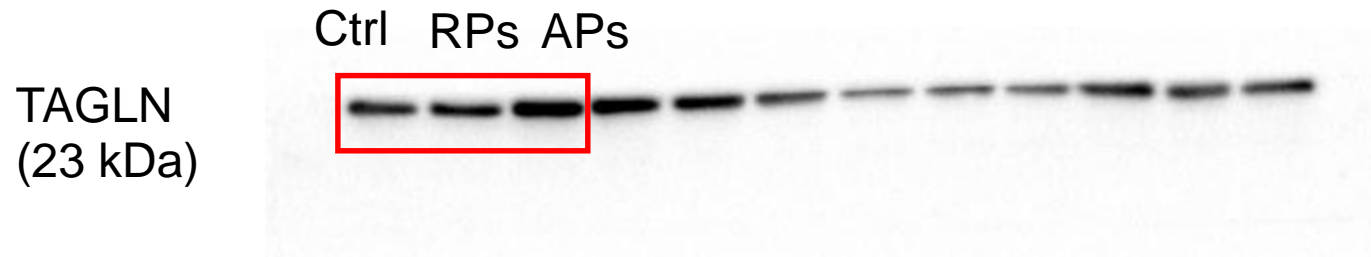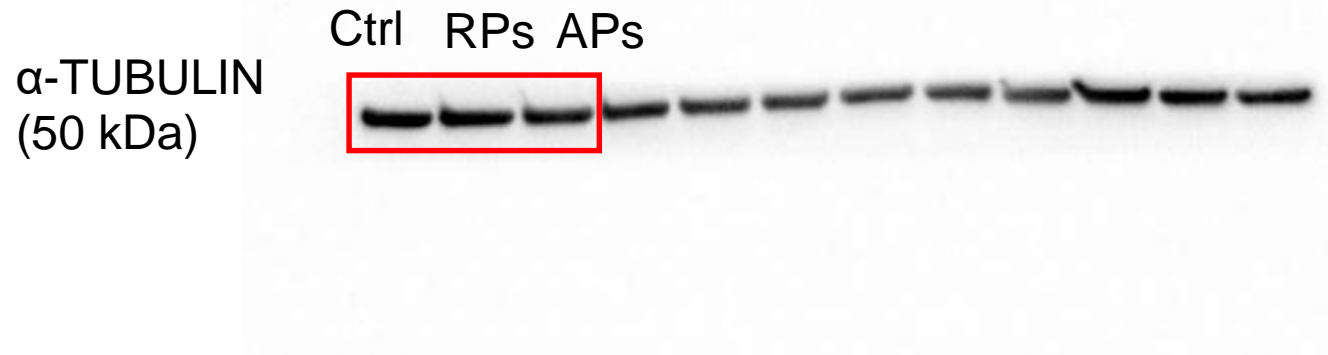

Full unedited gel for Figure1A  
Acquired with ChemiDoc (BioRad)

KLF4 (55 kDa)

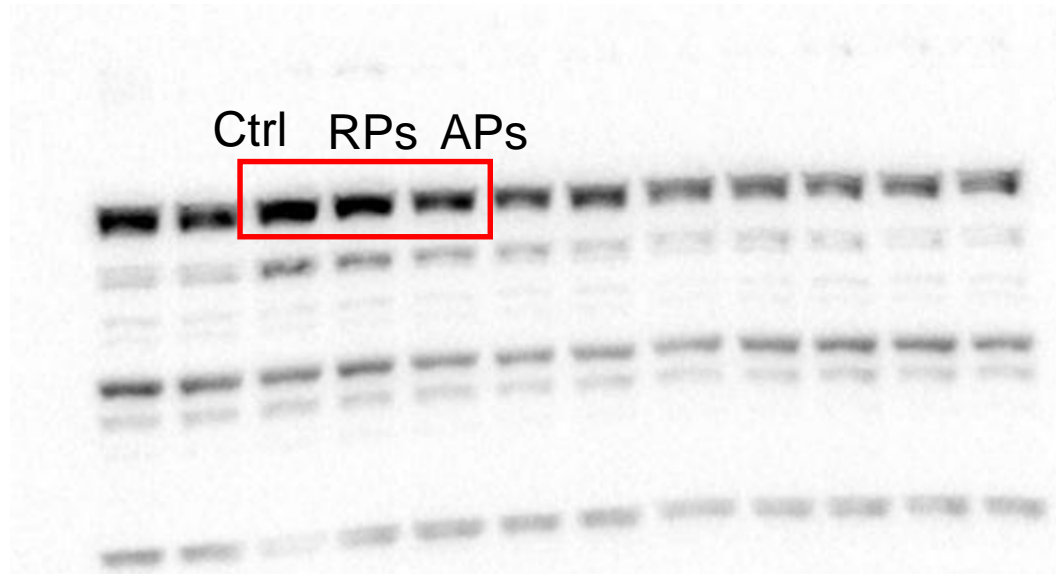

GAPDH  
37 (kDa)

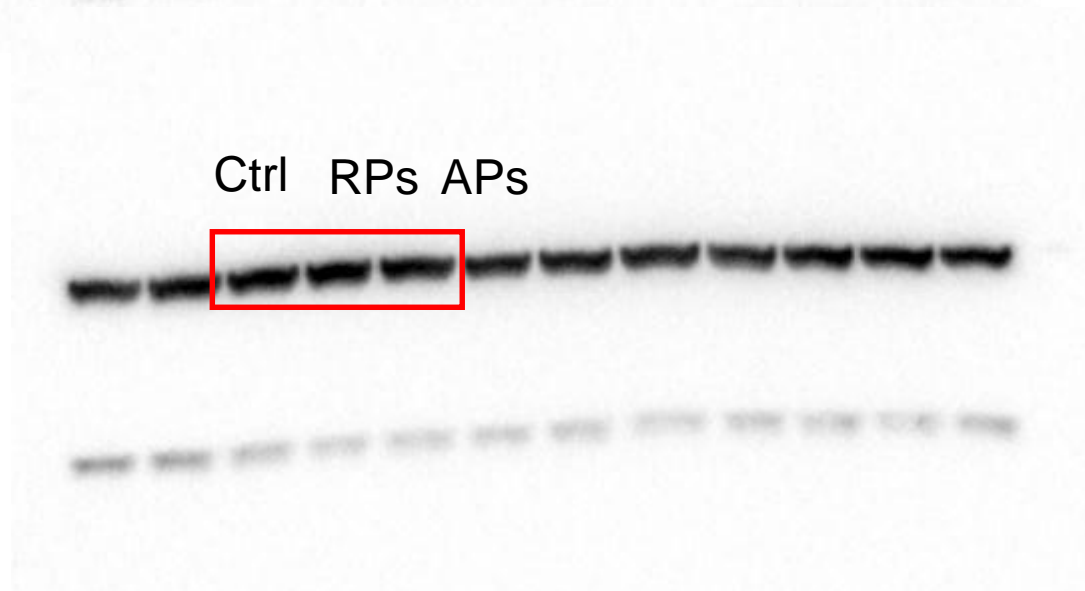

Full unedited gel for Figure1A  
Acquired with ChemiDoc (BioRad)

KLF5 (51 kDa)

Ctrl RPs APs

GAPDH  
37 (kDa)

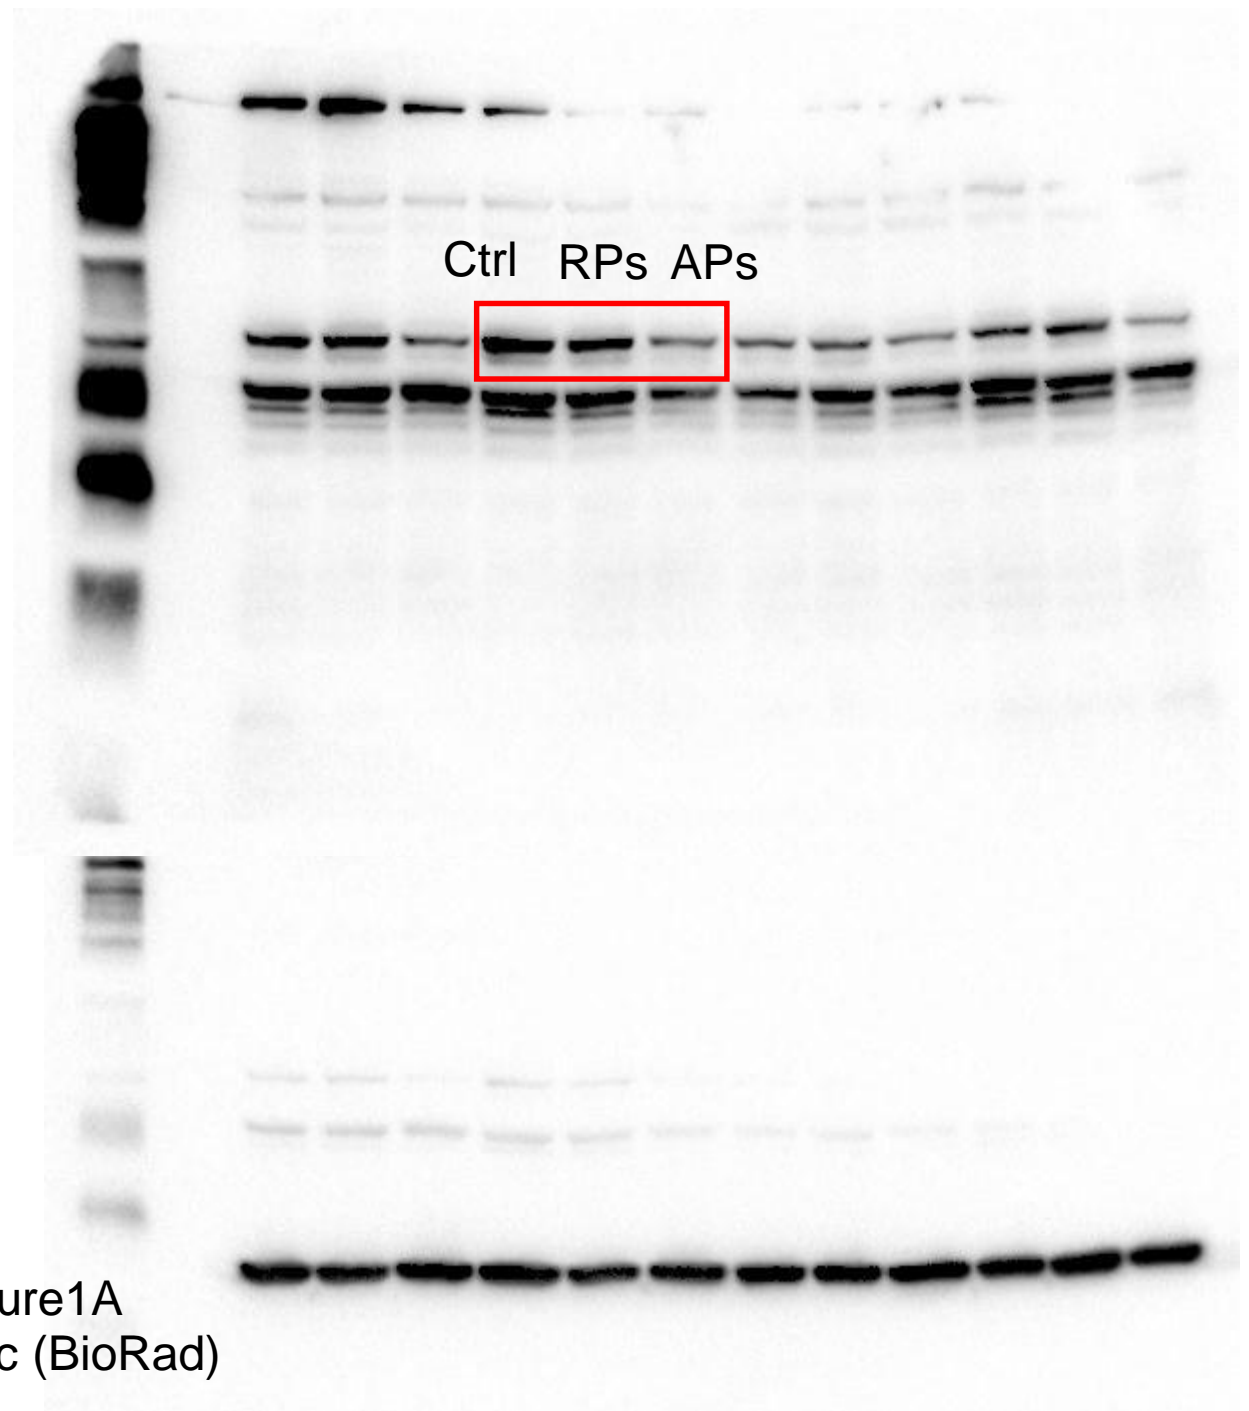

Full unedited gel for Figure 1A  
Acquired with ChemiDoc (BioRad)

OPN (35 kDa)

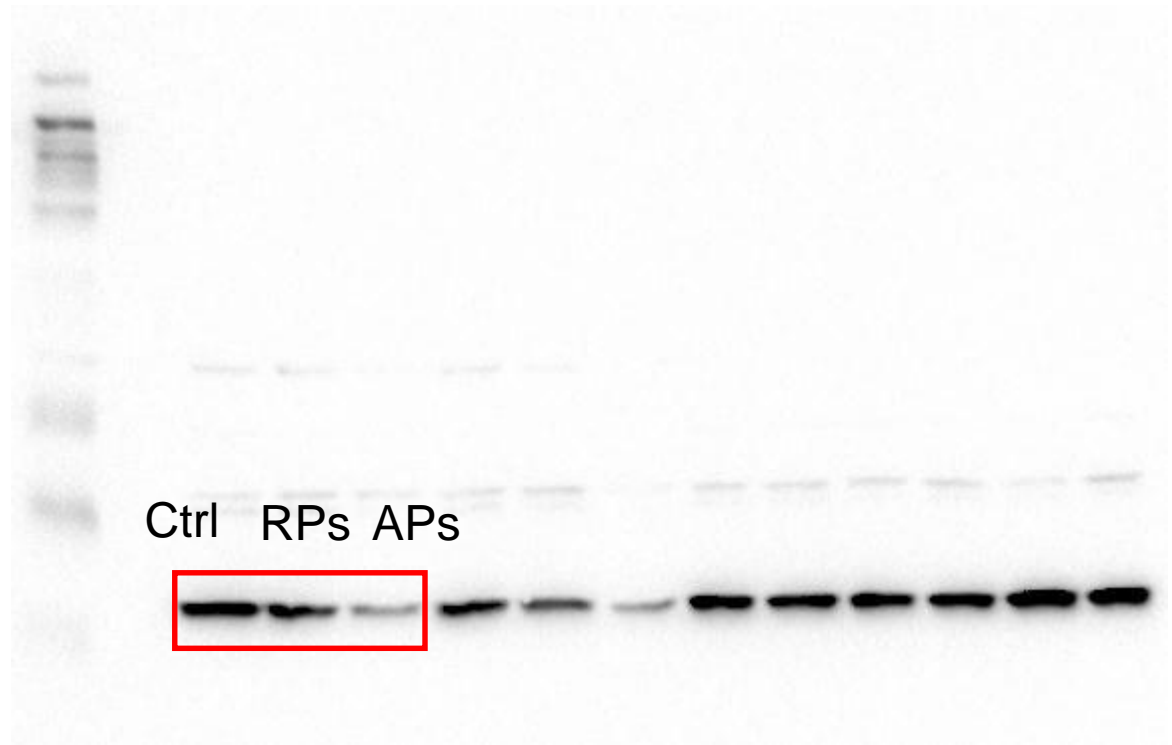

$\alpha$ -TUBULIN  
(50 kDa)

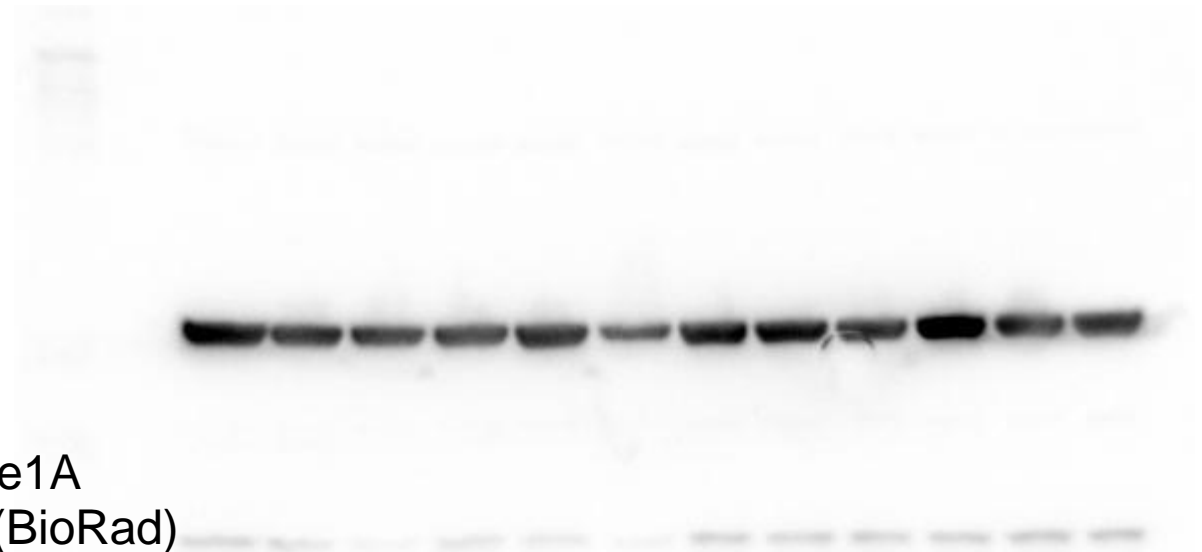

Full unedited gel for Figure 1A  
Acquired with ChemiDoc (BioRad)



ACTA2  
(42 kDa)

Ctrl

RPs

APs

Thrombin

Prostacyclin

RNase A

GAPDH  
37 (kDa)

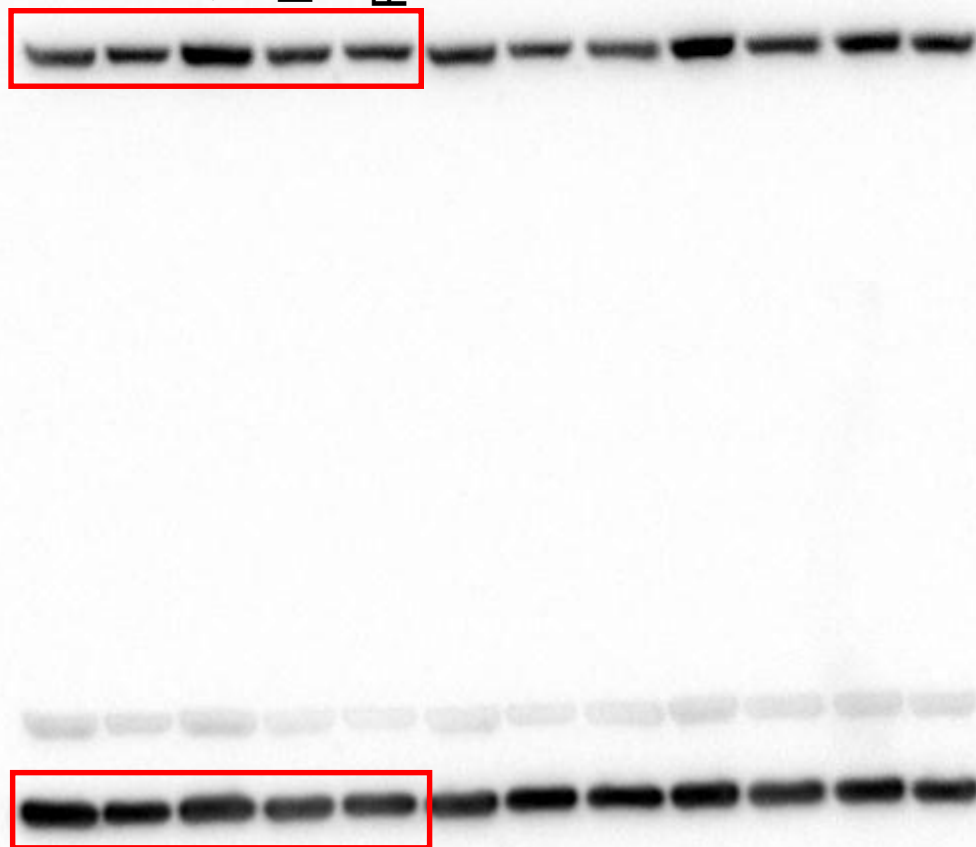

Full unedited gel for Figure 2D  
Acquired with ChemiDoc (BioRad)

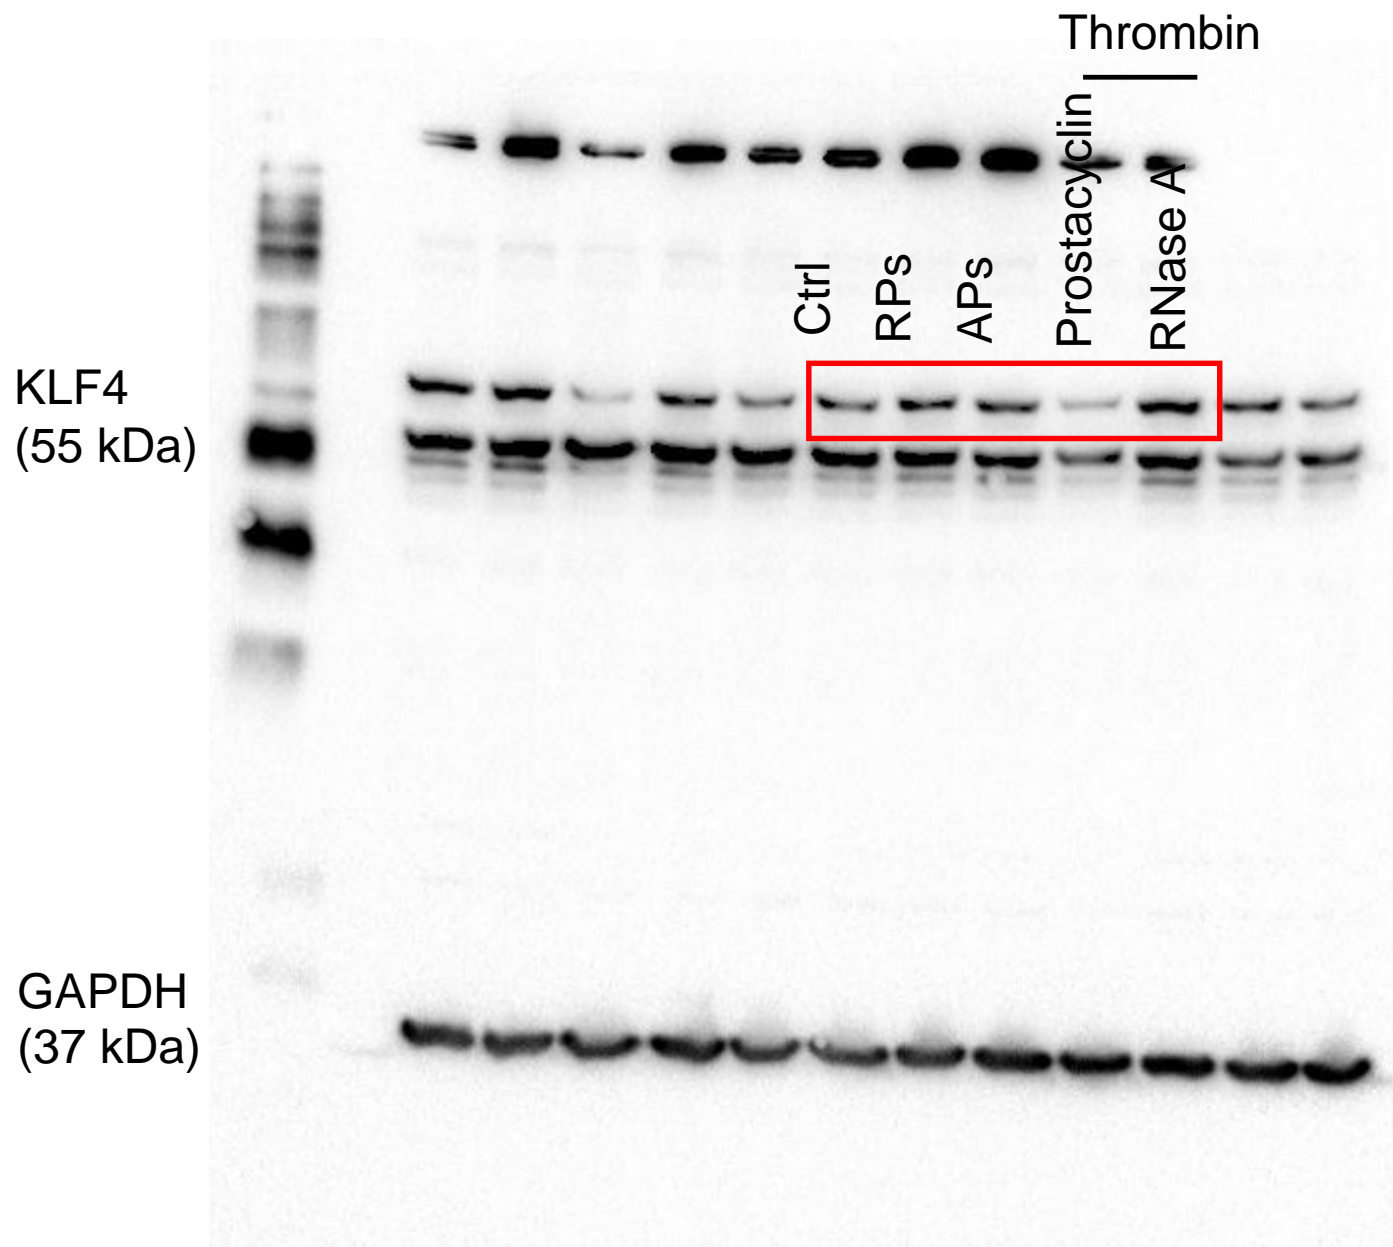

Full unedited gel for Figure 2E  
Acquired with ChemiDoc (BioRad)

PDGFR $\beta$   
(124 kDa)

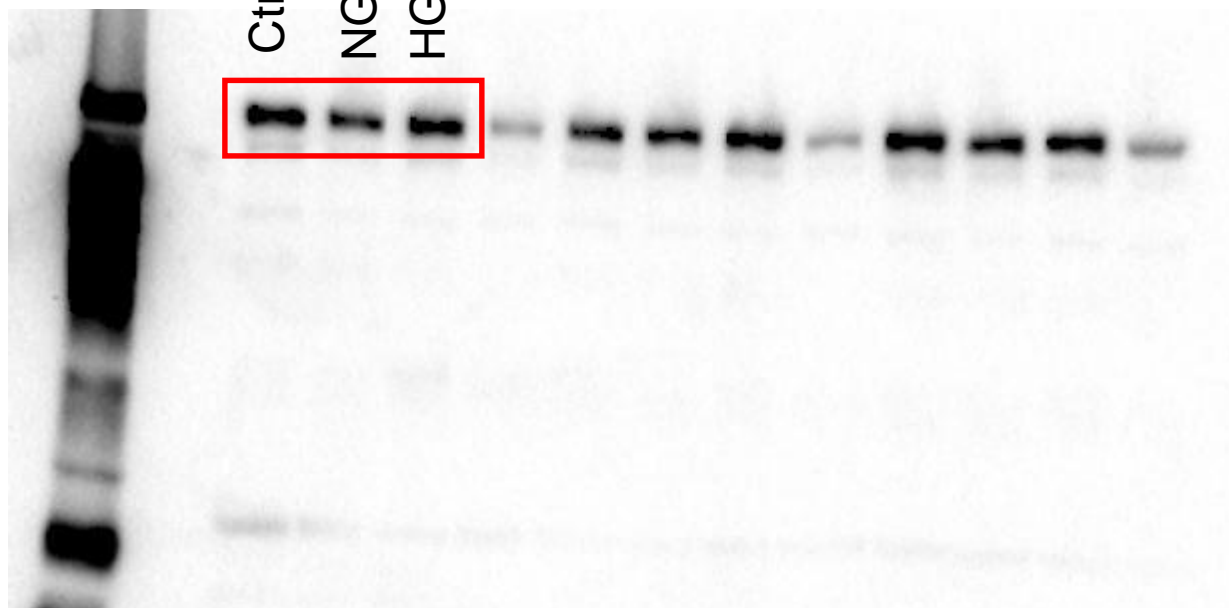

$\alpha$ -TUBULIN  
(50 kDa)

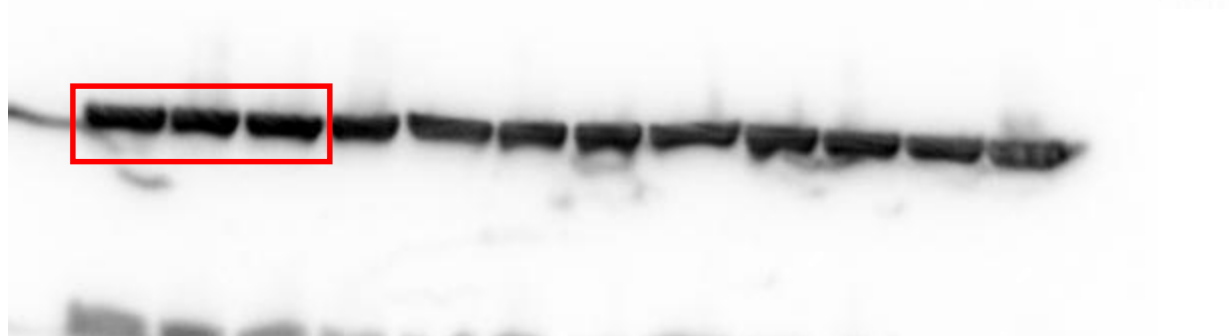

Full unedited gel for Figure 3B  
Acquired with ChemiDoc (BioRad)

KLF4  
(55 kDa)

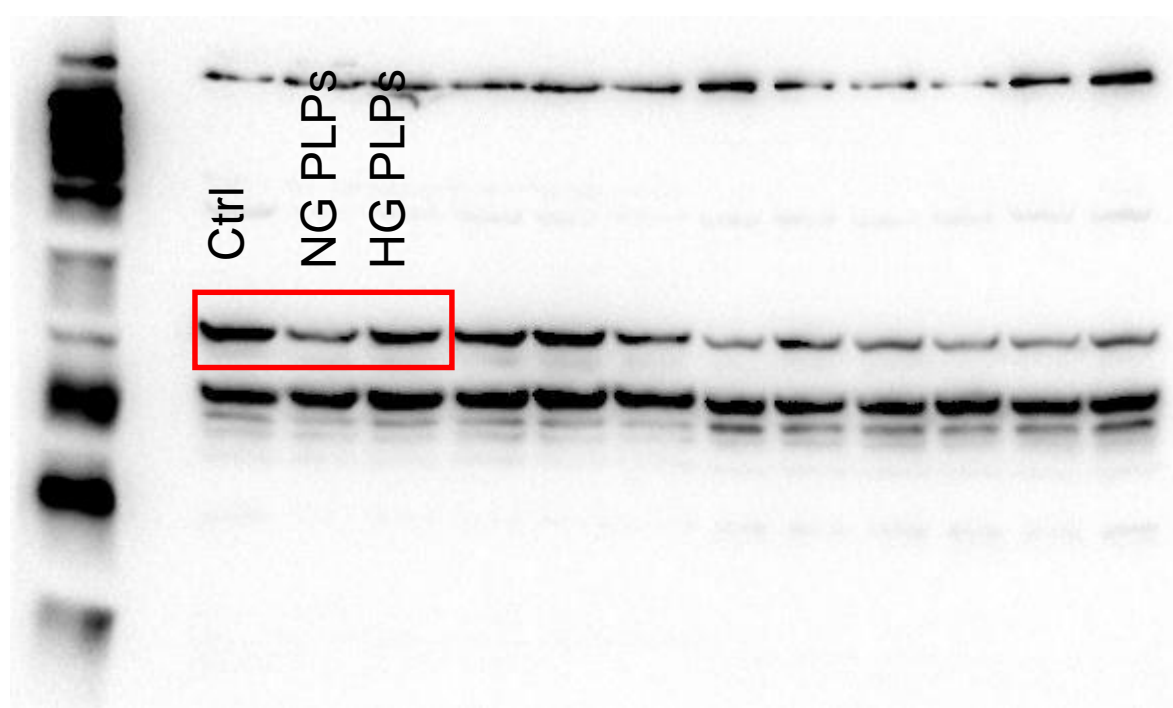

GAPDH  
(37 kDa)

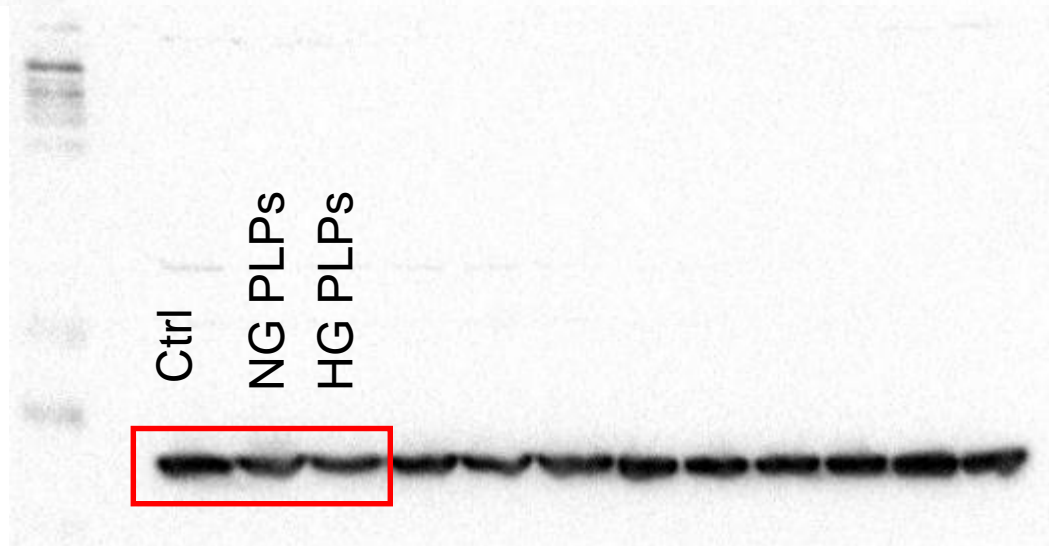

Full unedited gel for Figure 3B  
Acquired with ChemiDoc (BioRad)

KLF5  
(51 kDa)

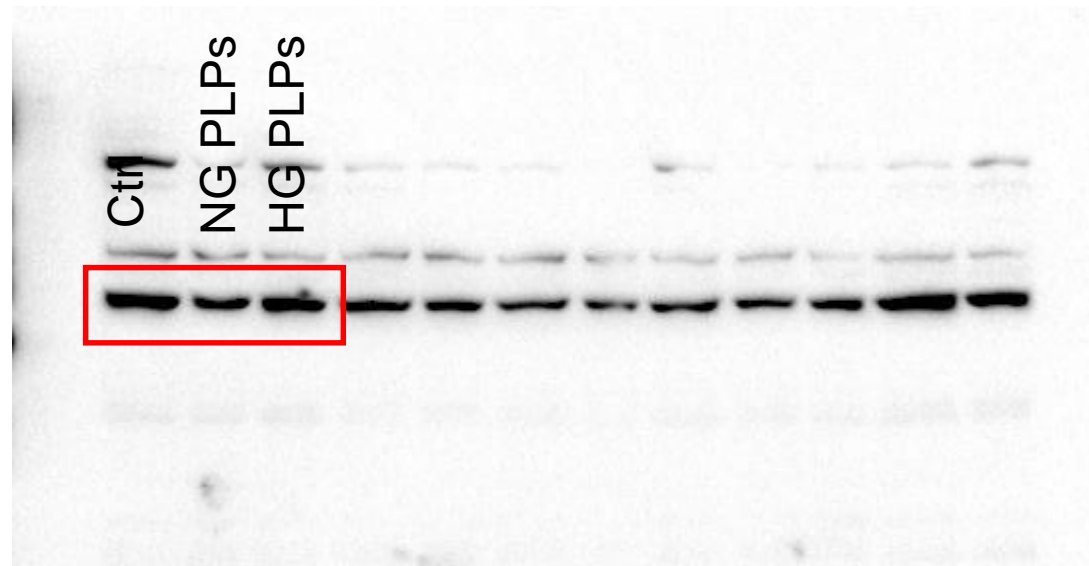

GAPDH  
(37 kDa)

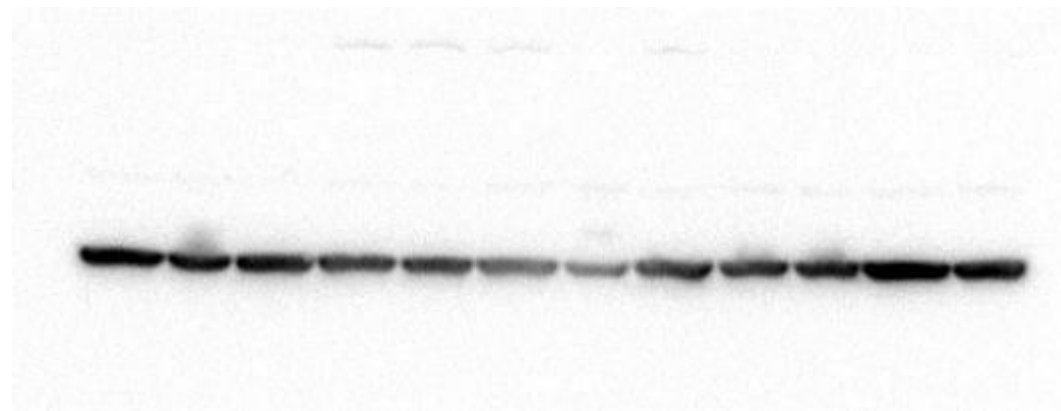

Full unedited gel for Figure 3B  
Acquired with ChemiDoc (BioRad)

PDGFR $\beta$   
(124 kDa)

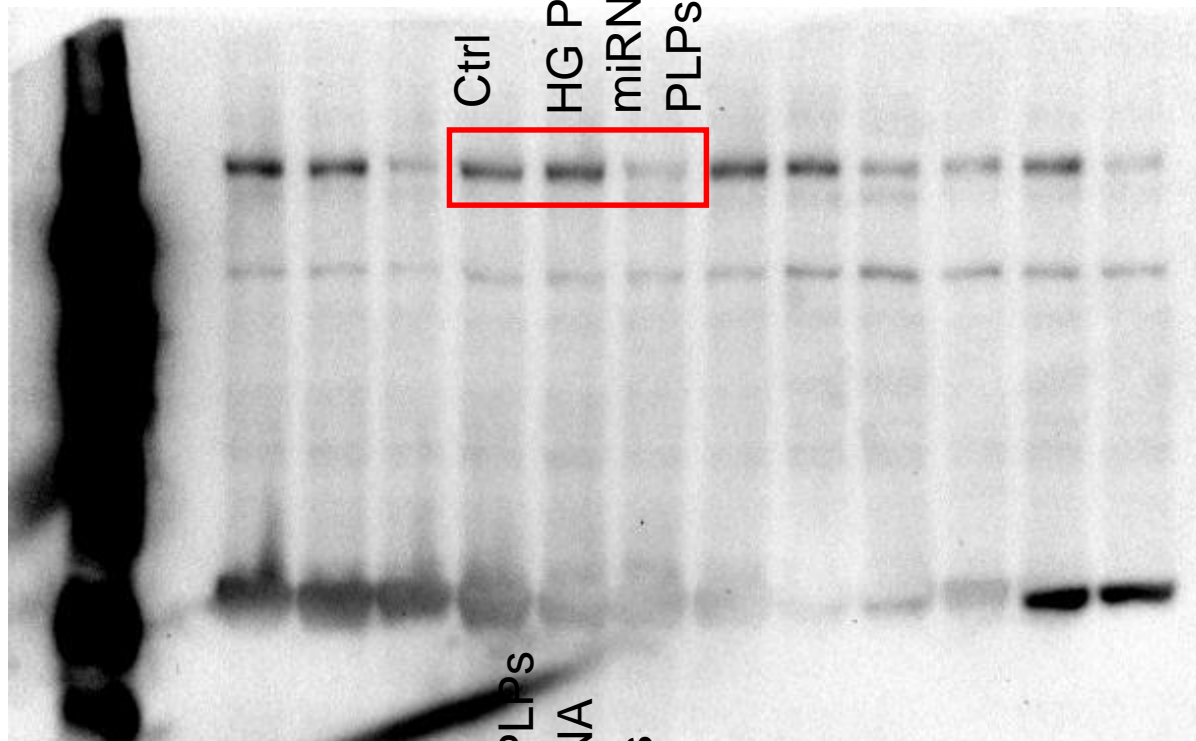

$\alpha$ -TUBULIN  
(50 kDa)

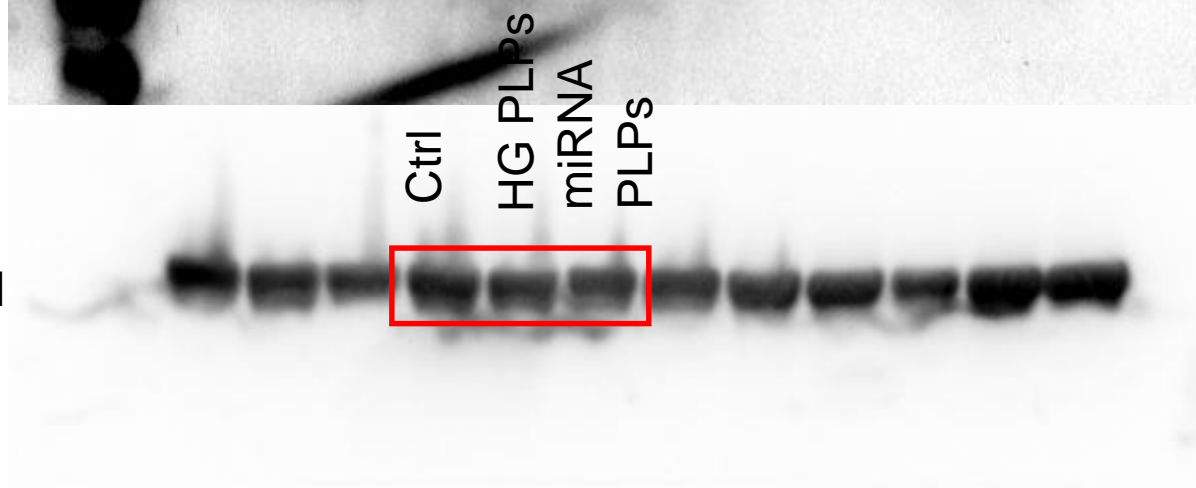

Full unedited gel for Figure 3C  
Acquired with ChemiDoc (BioRad)

KLF4  
(55 kDa)

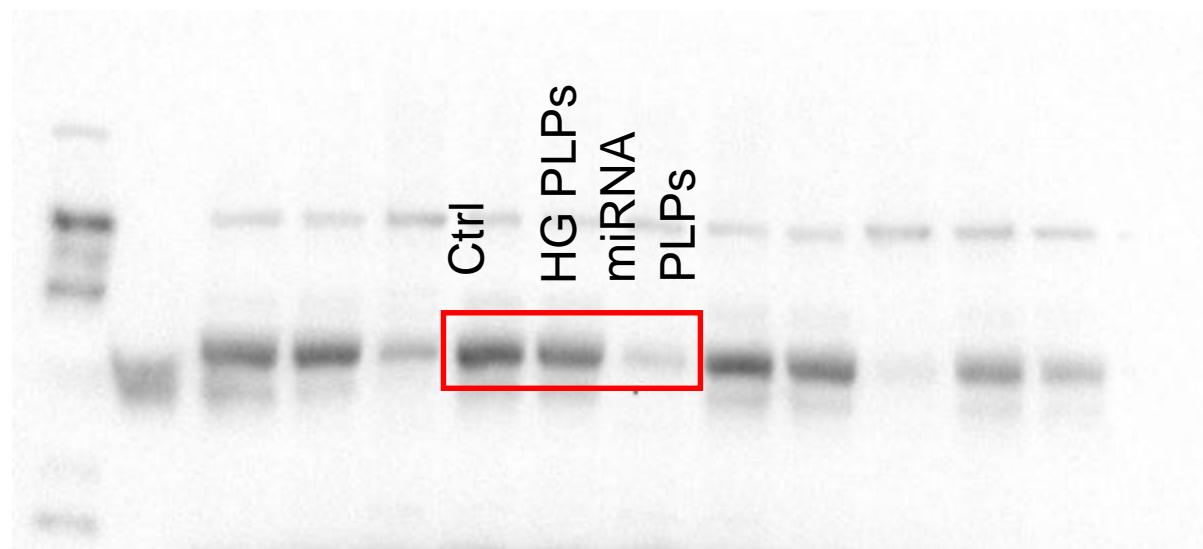

GAPDH  
(37 kDa)

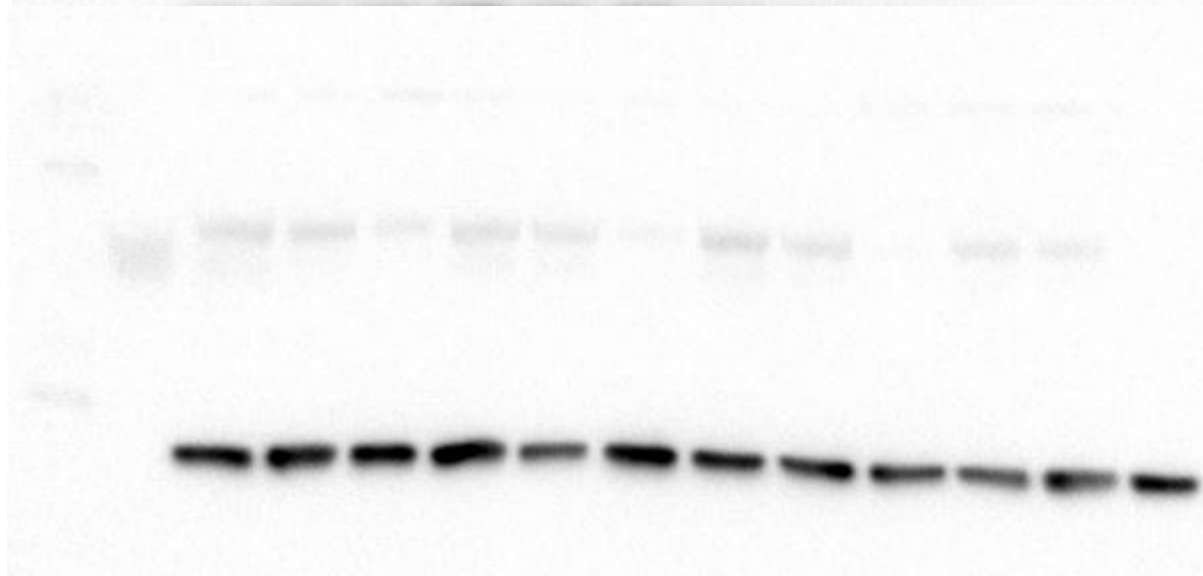

Full unedited gel for Figure 3C  
Acquired with ChemiDoc (BioRad)

KLF5  
(51 kDa)

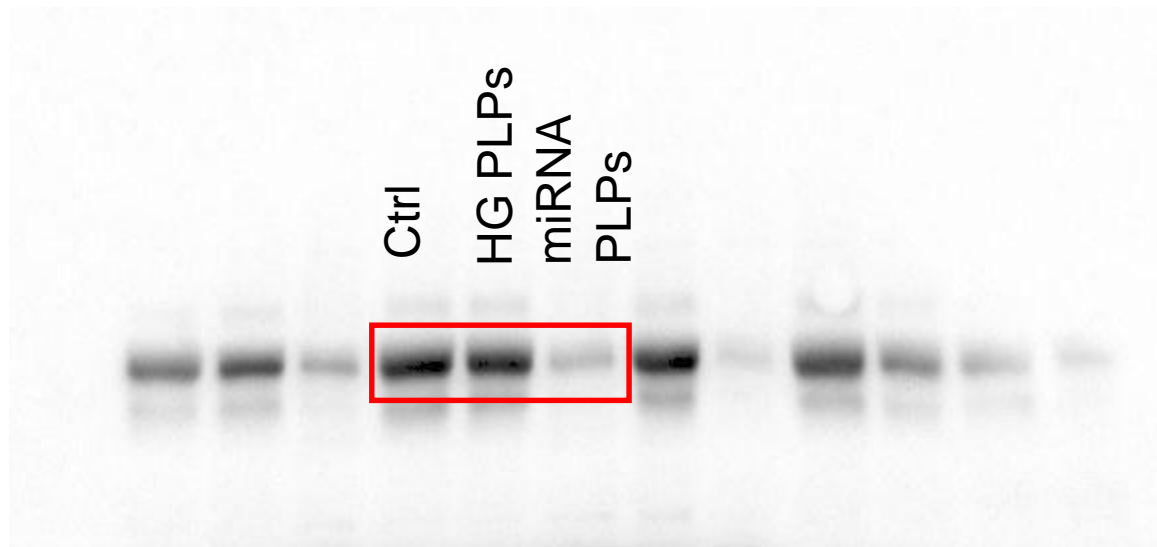

GAPDH  
(37 kDa)

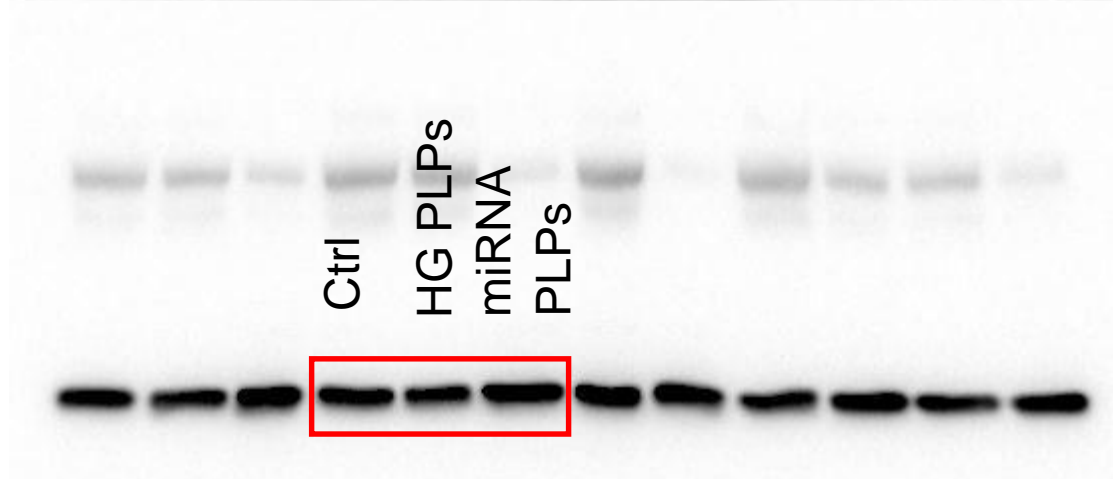

Full unedited gel for Figure 3C  
Acquired with ChemiDoc (BioRad)



PDGFR $\beta$   
(124 kDa)

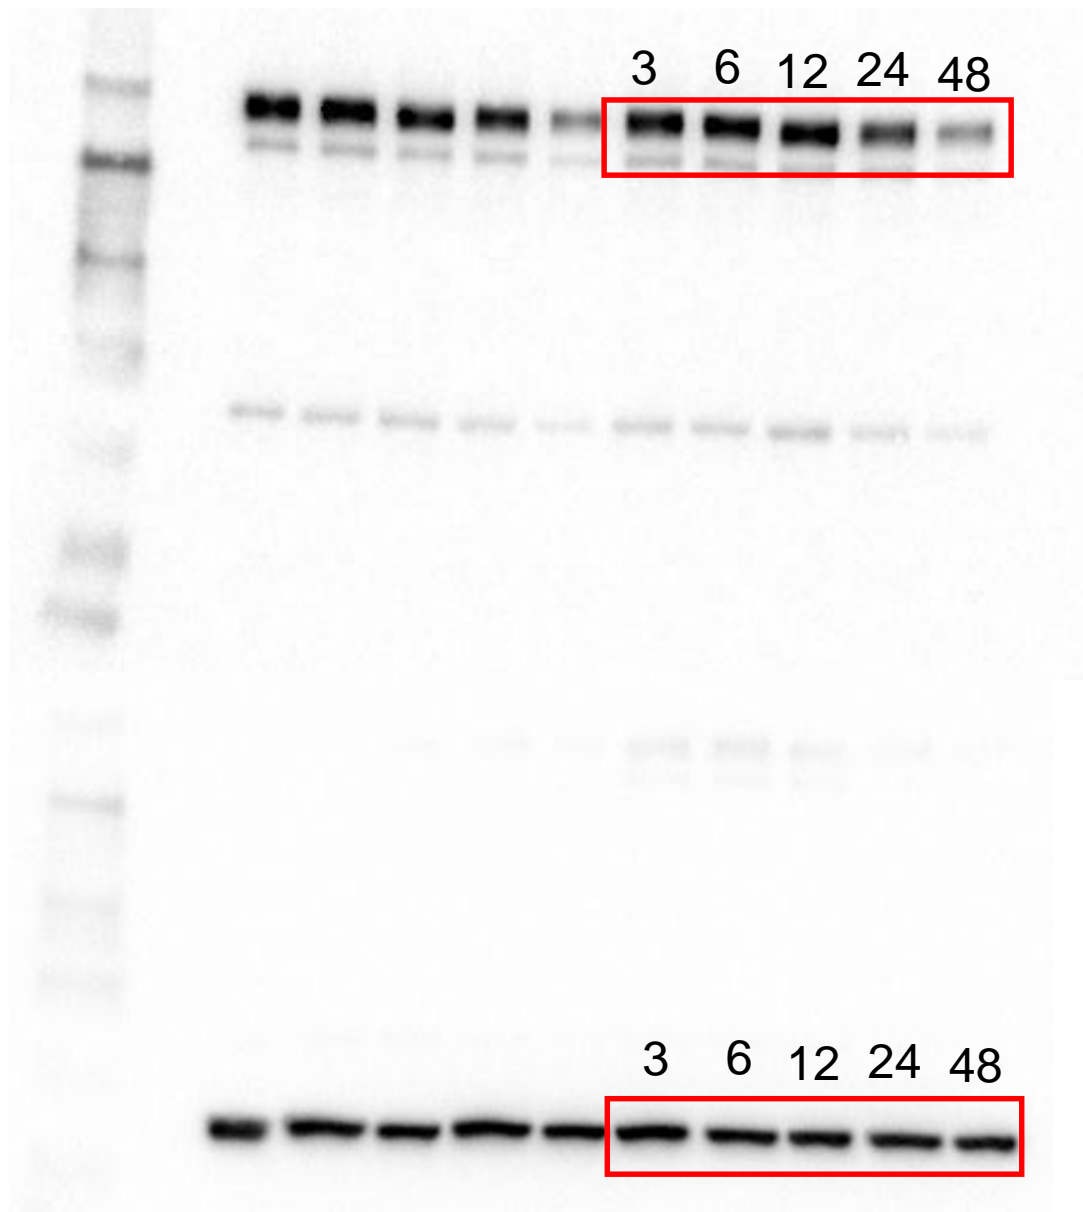

$\alpha$ -TUBULIN  
(50 kDa)

Full unedited gel for Figure 3D  
Acquired with ChemiDoc (BioRad)

PCNA  
(29 kDa)

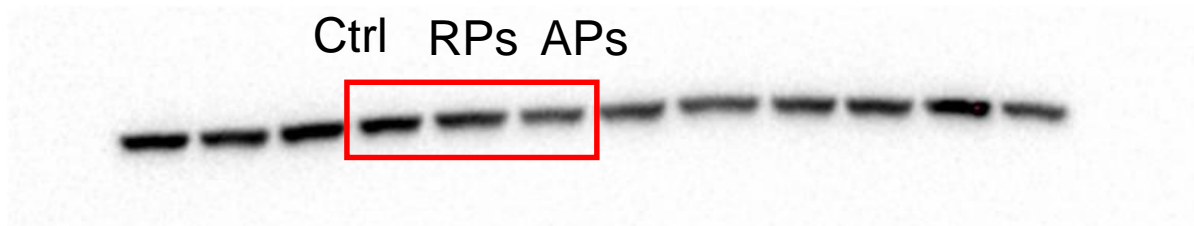

$\alpha$ -TUBULIN  
(50 kDa)

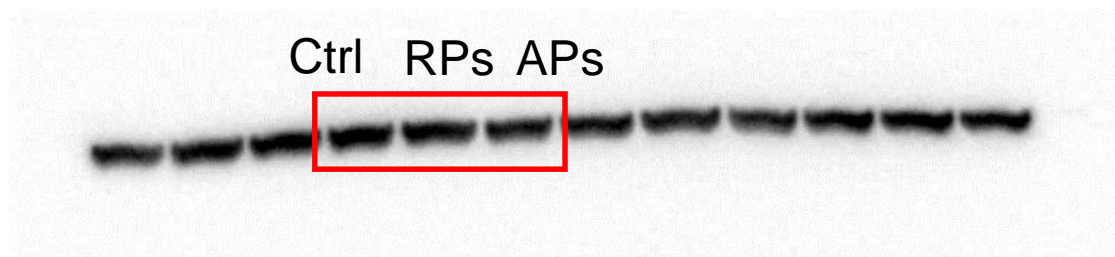

Full unedited gel for Figure S2B  
Acquired with ChemiDoc (BioRad)

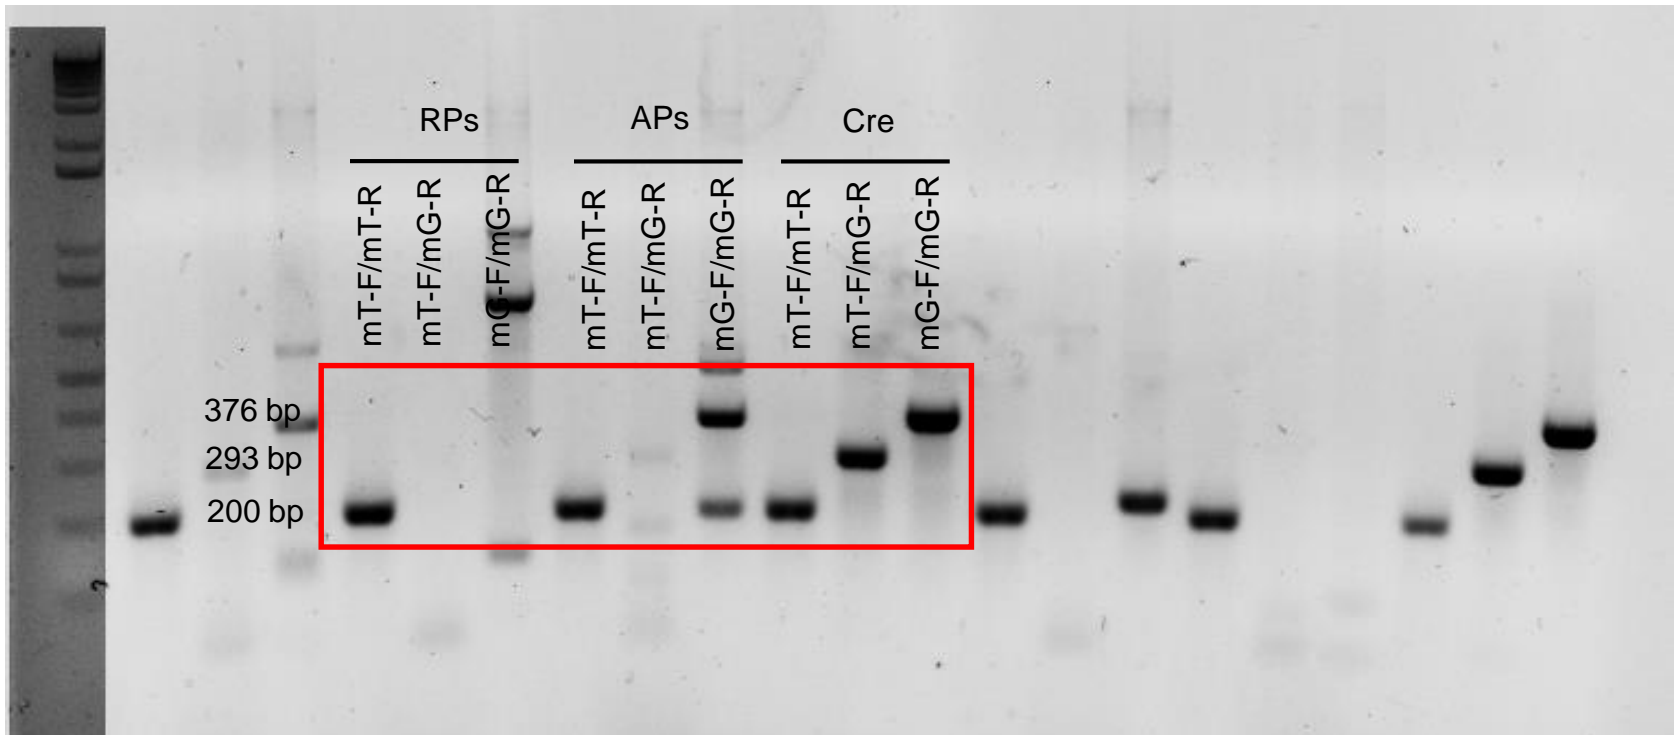

Full unedited gel for Figure S5B  
Acquired with ChemiDoc (BioRad)

PDGFR $\beta$   
(124 kDa)

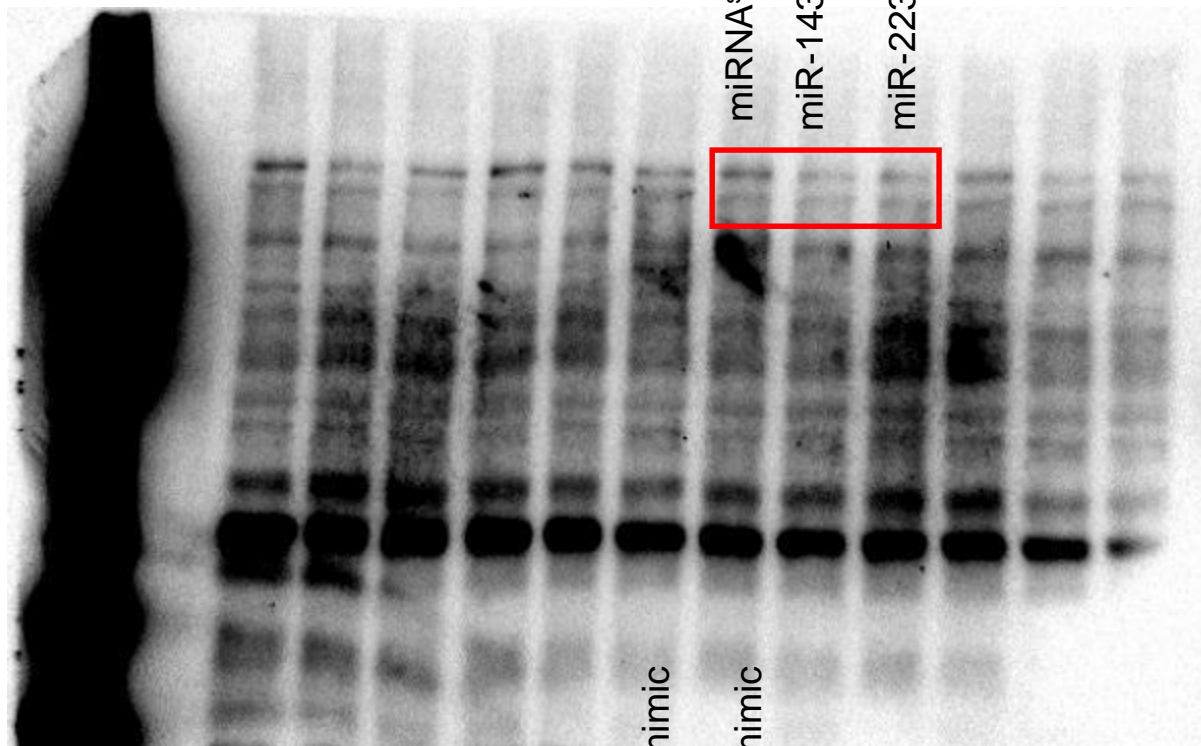

$\alpha$ -TUBULIN  
(50 kDa)

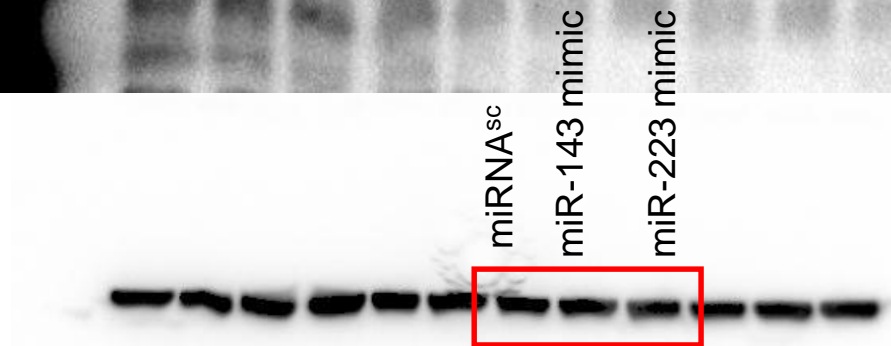

Full unedited gel for Figure S11C  
Acquired with ChemiDoc (BioRad)

KLF5  
(51 kDa)

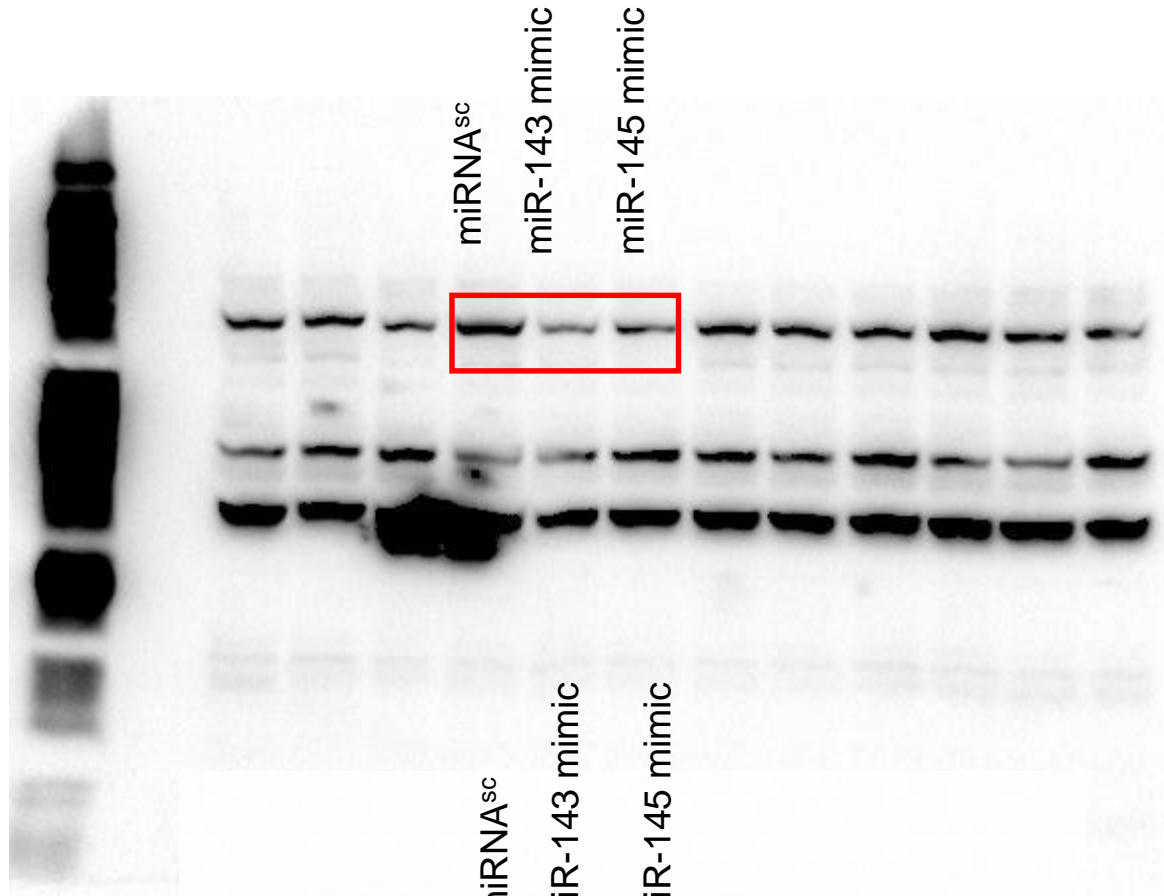

GAPDH  
(37 kDa)

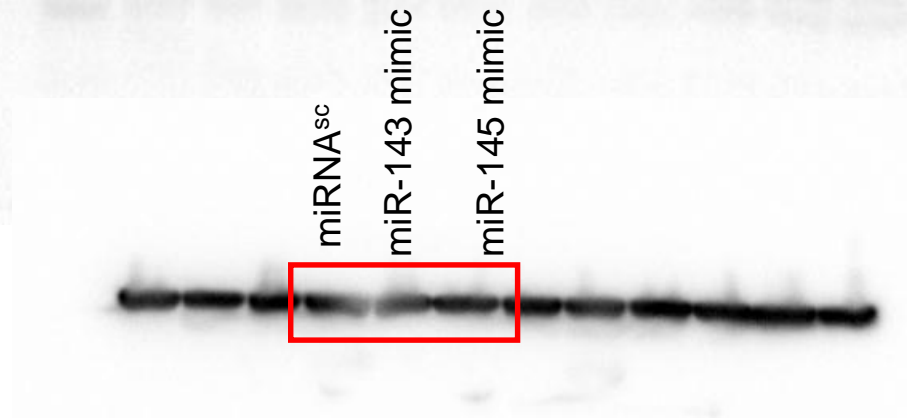

Full unedited gel for Figure S11F  
Acquired with ChemiDoc (BioRad)

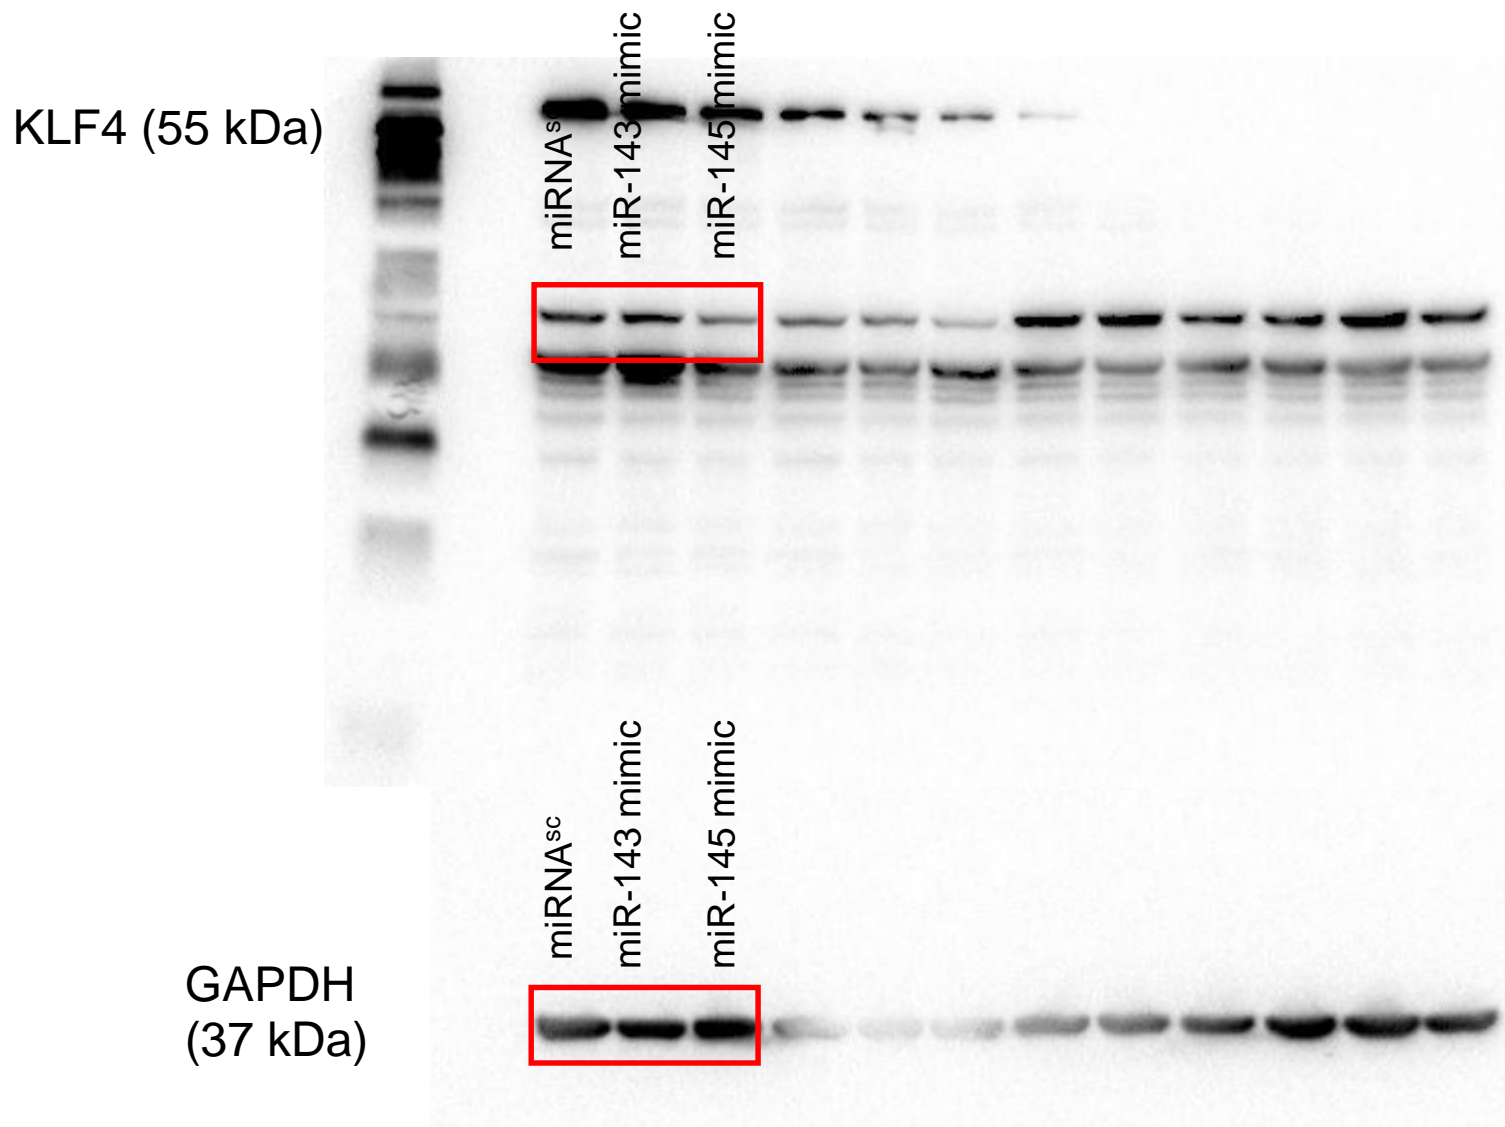

Full unedited gel for Figure S11H  
Acquired with ChemiDoc (BioRad)
